# Supplementary material for: Predictors of an early death in patients diagnosed with colon cancer: a retrospective case–control study in the UK
Source: PubMed Central journal article supplement (PMC6588982; doi:10.1136/bmjopen-2018-026057), 2019-06-19
Supplement: bmjopen-2018-026057.draft_revisions.pdf [file bmjopen-2018-026057.draft_revisions.pdf]

# BMJ Open

BMJ Open is committed to open peer review. As part of this commitment we make the peer review history of every article we publish publicly available.

When an article is published we post the peer reviewers' comments and the authors' responses online. We also post the versions of the paper that were used during peer review. These are the versions that the peer review comments apply to.

The versions of the paper that follow are the versions that were submitted during the peer review process. They are not the versions of record or the final published versions. They should not be cited or distributed as the published version of this manuscript.

BMJ Open is an open access journal and the full, final, typeset and author-corrected version of record of the manuscript is available on our site with no access controls, subscription charges or pay-per-view fees (<http://bmjopen.bmj.com>).

If you have any questions on BMJ Open's open peer review process please email [info.bmjopen@bmj.com](mailto:info.bmjopen@bmj.com)

# BMJ Open

## Predictors of an early death in patients diagnosed with colon cancer: a retrospective case-control study in the United Kingdom

|                               |                                                                                                                                                                                                                                                                                                                                                                                                                                                                                                                                                                             |
|-------------------------------|-----------------------------------------------------------------------------------------------------------------------------------------------------------------------------------------------------------------------------------------------------------------------------------------------------------------------------------------------------------------------------------------------------------------------------------------------------------------------------------------------------------------------------------------------------------------------------|
| Journal:                      | <i>BMJ Open</i>                                                                                                                                                                                                                                                                                                                                                                                                                                                                                                                                                             |
| Manuscript ID                 | bmjopen-2018-026057                                                                                                                                                                                                                                                                                                                                                                                                                                                                                                                                                         |
| Article Type:                 | Research                                                                                                                                                                                                                                                                                                                                                                                                                                                                                                                                                                    |
| Date Submitted by the Author: | 31-Aug-2018                                                                                                                                                                                                                                                                                                                                                                                                                                                                                                                                                                 |
| Complete List of Authors:     | Donnelly, Conan; National Cancer Registry Ireland, University of Cork<br>Hart, Nigel; Queen's University Belfast, School of Medicine, Dentistry and Biomedical Sciences - Centre for Public Health<br>McCrorie, Alan; Queen's University Belfast, Centre for Cancer Research and Cell Biology<br>Donnelly, Michael; Queen's University Belfast, Centre for Public Health<br>Anderson, Lesley; Queen's University Belfast, School of Medicine<br>Ranaghan, Lisa; Belfast Health and Social Care Trust<br>Gavin, Anna; Queen's University Belfast, N. Ireland Cancer Registry |
| Keywords:                     | Epidemiology < ONCOLOGY, STATISTICS & RESEARCH METHODS, Gastrointestinal tumours < ONCOLOGY, Colorectal surgery < SURGERY                                                                                                                                                                                                                                                                                                                                                                                                                                                   |
|                               |                                                                                                                                                                                                                                                                                                                                                                                                                                                                                                                                                                             |

SCHOLARONE™  
Manuscripts

1 **Conan Donnelly<sup>1\*</sup>, Nigel Hart<sup>2</sup>, Alan D McCrorie<sup>3</sup> Michael Donnelly<sup>4</sup>,**  
2  
3  
4 **Lesley A Anderson<sup>4</sup>, Lisa Ranaghan<sup>5</sup>, Anna Gavin<sup>1</sup>**  
5

6 1. N. Ireland Cancer Registry, Queen's University Belfast, 2. Department of General Practice, Queen's University  
7 Belfast, 3. School of Medicine, Dentistry and Biomedical Science, Queen's University Belfast. 4. Centre for Public  
8 Health, Queen's University Belfast. 5. Belfast, Health and Social Care Trust.  
9

10  
11 \*Corresponding author: c.donnelly@nicr.ie, National Cancer Registry Ireland, Cork Airport Business Park, Cork,  
12 T12 CDF7  
13

14  
15  
16  
17 **TITLE: Predictors of an early death in patients diagnosed with**  
18  
19  
20 **colon cancer: a retrospective case-control study in the United**  
21  
22 **Kingdom**  
23

24 (Running title: Predictors of an early death from colon cancer)  
25  
26  
27

#### 28 **KEY WORDS**

29  
30 Colon Cancer, Survival, health seeking, early death, early diagnosis  
31  
32  
33

#### 34 **FUNDING**

35  
36 The TEDI study was funded by the Cancer Research UK led National Awareness & Early  
37 Diagnosis Initiative (Principal Investigator: AG, Co-Investigators: CD, NH, AM, MD, LR, LA).  
38  
39 The Northern Ireland Cancer Registry is funded by the Public Health Agency Northern  
40 Ireland (Principal Investigator: AG)  
41  
42  
43  
44

#### 45 **COMPETING INTERESTS**

46  
47 There are no competing interests to be reported by the authors in this study  
48  
49  
50  
51

52 **WORD COUNT: 3923**  
53  
54  
55

56 **FIGURES: 1, TABLES: 5, SUPPLEMENTARY TABLES: 1**  
57  
58

**ABSTRACT**

**OBJECTIVE:** Despite considerable improvements, five-year survival rates for colon cancer in the United Kingdom (UK) remain poor when compared with other socioeconomically similar countries. Variation in five-year survival can be partly explained by higher rates of death within three months of diagnosis in the UK. This study investigated characteristics of patients who died within three months of a diagnosis of colon cancer with the aim of identifying specific patient factors that can be addressed or accounted for to improve survival outcomes.

**DESIGN:** A retrospective case-control study design was applied with matching on age, sex and year diagnosed. Colon cancer patient, disease, clinical and service characteristics, diagnosed in a UK region (2005-2010), who survived less than three months from diagnosis (cases) were compared with patients who survived between six and thirty-six months (controls). Patient and clinical data was sourced from General Practice notes and hospital databases 1-3 years pre-diagnosis.

**RESULTS:** Being older (aged  $\geq 78$  years) and living in deprivation quintile 5 (OR=2.64, CI: 1.15-6.06), being unmarried and living alone (OR=1.64, CI: 1.07-2.50), being underweight compared to normal weight or obese (OR=3.99, CI: 1.14-14.0) and being older and living in a rural as opposed to urban area (OR=1.96, CI: 1.21-3.17) were all independent predictors of early death from colon cancer. Missing information was also associated with early death including unknown stage, histological type and marital/accommodation status after accounting for other factors.

**CONCLUSION:** Several factors typically associated with social isolation were a recurring theme in patients who died early from colon cancer death. This association is unexplained by clinical or diagnostic pathway characteristics. Socially isolated patients are a key target group to improve outcomes of the worst surviving patients but further investigation is required to determine if being isolated itself is actually a cause of early death from colon cancer.

## Strengths and limitations of this study

- Study sample was generated from a high-quality population-based cancer registry system with relatively few death certificate only (DCO) cases.
- Case-control design provided an efficient method of collecting data and allowed development of a control group that was matched on important non-modifiable characteristics.
- Survival of controls was restricted to a population of patients whose survival was less than three years and similar to the case population.
- Study identified several characteristics which discriminated between cases and controls suggesting that patients who die within the first few months of diagnosis are a specific patient cohort who require attention.

## INTRODUCTION

Despite considerable improvements, United Kingdom (UK) survival rates for colon cancer remain poor by international comparison with higher five-year survival reported in Norway, Sweden, Canada and Australia<sup>1</sup> and poorer survival in the UK compared to several countries reported in Eurocare<sup>2</sup>. These deficits have largely been explained by survival at three months post diagnosis<sup>3</sup>. Patients who survive beyond this period in the UK have similar five-year survival rates to their counterparts in better performing countries<sup>1</sup>. Approximately 19% of colorectal cancer patients in the UK and 16% in the Northern Ireland (NI) died within three months of diagnosis between 2006 and 2008<sup>4, 5</sup>. It was estimated that if survival in England matched that of Norway, 13.6% fewer patients would die within the three month period<sup>3</sup>. Generally poor survival is linked with a number of factors including late stage disease at diagnosis<sup>6</sup>, poor patient fitness due to coexisting disease<sup>7</sup> and limited availability of and access to high quality investigations and treatment<sup>8</sup>.

Reasons for diagnostic delay in colorectal cancer are well documented<sup>9</sup>. Lower educational status<sup>10, 11</sup> and rural residence<sup>12, 13</sup> have been associated with delayed help seeking. Additionally, stronger social networks have been associated with shorter diagnostic delay<sup>14, 15, 16</sup>. Clinical characteristics also play a role, patients with co-morbid disease<sup>11, 17</sup> and/or multiple symptoms<sup>11</sup> are less likely to delay compared to those with non-specific symptoms<sup>17, 18</sup>. Application of referral guidelines by General Practitioners (GPs) has been shown to reduce delay<sup>19</sup> while younger patients<sup>13, 20</sup>, those of lower socio-economic status<sup>21</sup> and frequent help seekers<sup>10, 16</sup> were less likely to be referred. While bowel cancer screening was introduced in the UK in 2007<sup>22</sup> and in NI in 2011<sup>23</sup>, the vast majority patients are diagnosed clinically<sup>24</sup>, therefore the role of clinical decision making in early colon cancer diagnosis remains paramount.

The relationship between these factors and surviving past the first few months following a colon cancer diagnosis has not been adequately investigated and their role in explaining

1 international survival differences requires attention. The aim of this study was to investigate  
2 patient, clinical and disease factors associated with early death in colon cancer patients in  
3 Northern Ireland and to determine factors which might help to identify subgroups in the  
4 population for early diagnosis interventions.  
5  
6  
7  
8  
9

## 10 **METHODOLOGY**

11 This study employed a retrospective, individually matched, case-control design involving a  
12 posthumous review of primary care physician or GP and electronic secondary care notes.  
13 The study design was guided by the principles of the Aarhus statement on early diagnosis  
14 research<sup>25</sup>. Principles adhered to in this study include items 1-4, 7-9, and 20 of the Aarhus  
15 checklist. Date of initial cancer diagnosis is defined by the NICR as date of first tissue  
16 diagnosis in secondary care, not as symptom presentation in primary and/or secondary care.  
17  
18  
19  
20  
21  
22  
23  
24  
25  
26

### 27 **Case and control definition and identification**

#### 28 **Cases**

29 Patients diagnosed with primary colon cancer (ICD 10: C18) in NI between January 2005  
30 and December 2010 were identified using the Northern Ireland Cancer Registry (NICR).  
31 Using death registrations, provided by the NI General Registrar Office, the status and  
32 survival of patients was determined. Cases were defined as patients with an observed  
33 survival of under 90 days following diagnosis date (as assigned by NICR). A random sample  
34 of all eligible cases was selected using random number tables based on pre-defined power  
35 calculations.  
36  
37  
38  
39  
40  
41  
42  
43  
44

#### 45 **Controls**

46 Controls were patients with an observed survival lasting over six months and less than three  
47 years leaving a three month buffer between the survival rates of cases and controls.  
48 Controls were individually matched, using individual nearest neighbour matching<sup>26, 27</sup>, to  
49 cases by age (within 5-year age bands), sex and year of diagnosis (within 2-year groups).  
50  
51  
52  
53  
54  
55  
56  
57  
58  
59  
60

1 In both groups, patients with incident cancer identified by death certificate only (DCO) and  
2 patients with recurrence of a previous incident colon cancer were excluded.  
3  
4  
5

### 6 **Exposure variables and covariates**

7  
8 Data items were identified through literature review with items and categorisation defined in  
9 consultation with a clinical adviser, GP, a colorectal surgeon and an oncologist. Items were  
10 classified into seven areas: demographic [marital status, accommodation status, NI Multiple  
11 Deprivation Measure (NI MDM quintile), rural/urban status], lifestyle (smoking and alcohol  
12 status, health seeking activity including uptake of flu vaccine and frequency of GP  
13 attendance) and co-morbidities (Charlson Co-Morbidity score [CCI] and psychiatric  
14 illnesses). These characteristics were collected from information recorded between one and  
15 three years before diagnosis. Marital and accommodation status were merged in final  
16 analysis due to multicollinearity. Disease characteristics included symptoms in the year to  
17 diagnosis, disease stage at diagnosis with histology, morphology and grade collected from  
18 pathology records held in the NICR. GP and hospital episodes [including symptoms  
19 (classified as 'vague' or 'alarm' based on NICE Guidelines for Suspected Cancer Referral  
20 guidelines), clinician actions (number of GP episodes before diagnosis and referral) and  
21 investigations ordered]. In addition, treatment [first treatment type, treatment intent, surgical  
22 resection (y/n), radiotherapy (y/n), chemotherapy (y/n)] and death information (date, place  
23 and cause of death) were also collected. Data were collected by two trained data abstractors  
24 under the guidance of a medically trained clinical adviser using a common bespoke  
25 proforma. Data was sourced from GP records, electronic hospital records including the  
26 hospital discharge records, multidisciplinary team (MDT) and oncology data systems. The  
27 study target sample was 600 cases matched to 600 controls with this sample it was  
28 estimated the study would have over 90% power to detect (at the 5% level) a 10-percentage  
29 point difference in the proportion of married cases vs controls where 47% of the control  
30 group were married.  
31  
32  
33  
34  
35  
36  
37  
38  
39  
40  
41  
42  
43  
44  
45  
46  
47  
48  
49  
50  
51  
52  
53  
54  
55  
56  
57  
58  
59  
60



## Statistical method

Data was analysed using 'STATA 14 (StataCorp 2015)'. All missing data were categorised as unknown and included in the analysis. Univariate analysis involved cross-tabulation of all categorical variables with case/control status. Conditional logistic regression (CLR) was used to produce unadjusted odds ratios and associated 95% confidence intervals to identify independent factors associated with early death. Patient characteristics, significant at the  $p < 0.25$ , were included in a minimally adjusted multivariable model to test independence from other co-morbidities, patient and disease characteristics. Stage and pathway to diagnosis characteristics (number of A&E and GP episodes in three months preceding diagnosis) were added to the models to assess the degree to which they explained variation in early death among different patient groups. Age (a binary classification around median age [78 years] of cases) and sex stratified univariate and multivariable analysis were undertaken to investigate differences in patterns in early death between these groups.

## Patient and public involvement

Members of the public including patients were not involved in the design or analysis stages of this piece of non-interventional research but research question was designed to explore characteristics of patients who die early after a diagnosis of colon cancer. Ethical approval for this study was granted by the Office of Research Ethics Committees Northern Ireland (12/NI/0034). This committee receives input from lay member(s) of the public before reaching a decision about whether or not to approve research studies.

## RESULTS

There were 4,358 colon cancer tumours between 2005 and 2010 registered by the NICR. Of these, 743 (17%) related to patients who died within 3 months of diagnosis and 1,069 related to patients who died between six months and three years. Following exclusions and sampling (Figure 1), 484 cases and the same number of matched controls were generated.

There were no significant differences between cases included in the study and those not included (Supplementary Table 1) regarding stage at diagnosis, deprivation quintile, age and survival. However, the study group included significantly more males than females as well as fewer patients diagnosed in 2009 and 2010 due to resource constraints in data collection.

### Univariate analysis

Compared to married patients, odds of early death were higher among single, widowed and those with unknown marital status (Table 1). Those who lived alone, in nursing or residential care or were living with another relative were more likely to die within three months compared to those living with a spouse/partner. Odds of early death were also higher in the most deprived communities (23%) compared to the least deprived (13%) (Table 1).

**Table 1: Demographic characteristics of cases and controls and associated odds ratios for early death and 95% confidence intervals**

| Characteristic       |                     | Case |      | Control |      | OR†  | 95% CI      |
|----------------------|---------------------|------|------|---------|------|------|-------------|
|                      |                     | n    | %    | n       | %    |      |             |
| Accommodation status | Spouse/ partner     | 156  | 32.2 | 233     | 48.1 | 1    |             |
|                      | Nursing/residential | 48   | 9.9  | 23      | 4.8  | 3.93 | 2.18 – 7.09 |
|                      | Sheltered dwelling  | 8    | 1.7  | 14      | 2.9  | 0.91 | 0.37 – 2.24 |
|                      | Alone               | 156  | 32.2 | 152     | 31.4 | 1.74 | 1.23 – 2.45 |
|                      | Lives with relative | 53   | 11.0 | 40      | 8.3  | 2.32 | 1.41 – 3.82 |
|                      | Unknown             | 63   | 13.0 | 22      | 4.6  | 5.32 | 3.00 – 9.43 |
| Marital status       | Married/Cohabiting  | 189  | 39.1 | 257     | 53.1 | 1    |             |
|                      | Divorced            | 15   | 3.1  | 13      | 2.7  | 1.51 | 0.66 – 3.45 |
|                      | Unknown             | 44   | 9.1  | 15      | 3.1  | 3.79 | 2.06 – 6.96 |
|                      | Single              | 74   | 15.3 | 53      | 11.0 | 1.88 | 1.25 – 2.84 |
|                      | Widowed             | 162  | 33.5 | 146     | 30.2 | 1.60 | 1.14 – 2.22 |

|                                          |                     |     |      |     |      |      |             |
|------------------------------------------|---------------------|-----|------|-----|------|------|-------------|
| Urban/rural status                       | Rural               | 178 | 63.2 | 166 | 65.7 | 1    |             |
|                                          | Urban               | 306 | 36.8 | 318 | 34.3 | 0.89 | 0.68 – 1.17 |
| Deprivation quintile                     | Q1 (least deprived) | 64  | 13.2 | 89  | 18.4 | 1    |             |
|                                          | Q2                  | 95  | 19.6 | 92  | 19.0 | 1.45 | 0.76 – 1.74 |
|                                          | Q3                  | 106 | 21.9 | 111 | 22.9 | 1.01 | 0.66 – 1.54 |
|                                          | Q4                  | 110 | 22.7 | 102 | 21.1 | 1.49 | 0.99 – 2.24 |
|                                          | Q5 (most deprived)  | 109 | 22.5 | 90  | 18.6 | 1.47 | 0.95 - 2.27 |
| Flu uptake                               | No uptake           | 71  | 14.7 | 47  | 9.7  | 1    |             |
|                                          | ≥1 vaccination      | 324 | 66.9 | 345 | 71.3 | 0.63 | 0.43-0.94   |
|                                          | Unknown             | 89  | 18.4 | 92  | 19.0 | 0.65 | 0.40-1.05   |
| Baseline consultation activity (tertile) | <11                 | 149 | 30.8 | 156 | 32.2 | 1    |             |
|                                          | 11-19               | 148 | 30.6 | 162 | 33.5 | 0.98 | 0.71-1.34   |
|                                          | ≥20                 | 187 | 38.6 | 166 | 34.3 | 1.20 | 0.87-1.67   |
| Smoking                                  | Non-smoker          | 221 | 45.7 | 219 | 15.7 | 1    |             |
|                                          | Ex-smoker           | 141 | 29.1 | 175 | 36.2 | 0.76 | 0.55 – 1.04 |
|                                          | Current smoker      | 91  | 18.8 | 76  | 15.7 | 1.19 | 0.81 – 1.75 |
|                                          | Unknown             | 31  | 6.4  | 14  | 2.9  | 2.30 | 1.16 – 4.56 |
| Alcohol Consumption                      | Current drinker     | 154 | 31.8 | 175 | 36.2 | 1    |             |
|                                          | Ex-drinker          | 31  | 6.4  | 26  | 5.4  | 1.37 | 0.78 – 2.43 |
|                                          | Never drank         | 189 | 39.1 | 191 | 39.5 | 1.13 | 0.82 – 1.55 |
|                                          | Unknown             | 110 | 22.7 | 92  | 19.0 | 1.38 | 0.96 – 1.99 |

† Conditional logistic regression odds ratios for cases and controls matched on age, sex and year diagnosed

Baseline GP consultation activity was not associated with early death. Regarding flu vaccine uptake, it was not possible to identify patients who were invited for flu vaccine though based on age alone, 86% of cases were eligible. Approximately 70% took the flu vaccine at least once during the 1-3 years period before diagnosis; 15% did not attend for the flu vaccine and attendance for the remaining 18% was unknown. Patients who attended twice in the 1-3 year

period before diagnosis had lower odds of early death than patients who did not attend. Smoking status was not significantly associated with early death with the exception of those who had an unknown smoking status (see Table 1).

Being underweight (BMI <18.5) was strongly associated with early death compared to patients with a normal BMI. Furthermore, obesity was not associated with early death (Table 2). Co-morbidity was common among patients who died early. Almost three quarters (72%) had at least one co-morbidity. CCI score was, however, not associated with early death (mean CCI score for cases was 4.75 compared to 4.90 for controls ( $p=0.32$ ). Dementia was the only co-morbidity within the CCI that was associated with early death - it was present in 8% of cases compared to 4% of controls (Table 2).

**Table 2: Presence of individual co-morbidities included in the Charlson score in cases and controls and associated clogit odds ratios and 95% confidence intervals**

| Characteristic          |     | Case |      | Control |      | OR   | 95% CI    |
|-------------------------|-----|------|------|---------|------|------|-----------|
|                         |     | n    | %    | n       | %    |      |           |
| Underweight             | No  | 467  | 96.5 | 479     | 99.0 | 1    |           |
|                         | Yes | 17   | 3.5  | 5       | 1.0  | 3.4  | 1.25–9.22 |
| Obese                   | No  | 425  | 87.8 | 420     | 86.8 | 1    |           |
|                         | Yes | 59   | 12.2 | 64      | 13.2 | 0.91 | 0.63–1.33 |
| Dementia                | No  | 445  | 91.9 | 462     | 95.5 | 1    |           |
|                         | Yes | 39   | 8.1  | 22      | 4.6  | 1.85 | 1.07–3.19 |
| Hypertension            | No  | 279  | 57.6 | 260     | 53.7 | 1    |           |
|                         | Yes | 205  | 42.4 | 224     | 46.3 | 0.84 | 0.6–1.10  |
| Ischaemic heart disease | No  | 391  | 80.8 | 386     | 79.8 | 1    |           |
|                         | Yes | 93   | 19.2 | 98      | 20.3 | 0.94 | 0.68–1.29 |
| Parkinson's Disease     | No  | 473  | 97.7 | 477     | 98.6 | 1    |           |
|                         | Yes | 11   | 2.3  | 7       | 1.5  | 1.57 | 0.61–4.05 |
| Valvular heart          | No  | 422  | 87.2 | 416     | 86.0 | 1    |           |

|                                |     |     |       |     |      |      |           |
|--------------------------------|-----|-----|-------|-----|------|------|-----------|
| disease                        | Yes | 62  | 12.8  | 68  | 14.1 | 0.89 | 0.61–1.31 |
| Myocardial Infarction          | No  | 429 | 88.6  | 436 | 90.1 | 1    |           |
|                                | Yes | 55  | 11.4  | 48  | 9.9  | 1.16 | 0.78–1.72 |
| Congestive heart failure       | No  | 459 | 94.8  | 451 | 93.2 | 1    |           |
|                                | Yes | 25  | 5.2   | 33  | 6.8  | 0.72 | 0.41–1.27 |
| Peripheral vascular disease    | No  | 452 | 93.4  | 462 | 95.5 | 1    |           |
|                                | Yes | 32  | 6.6   | 22  | 4.6  | 1.53 | 0.86–2.72 |
| Cerebrovascular disease        | No  | 433 | 89.5  | 440 | 90.9 | 1    |           |
|                                | Yes | 51  | 10.5  | 44  | 9.1  | 1.18 | 0.77–1.81 |
| COPD                           | No  | 402 | 83.1  | 397 | 82.0 | 1    |           |
|                                | Yes | 82  | 16.9  | 87  | 18.0 | 0.98 | 0.64–1.50 |
| Connective tissue disorder     | No  | 441 | 91.1  | 440 | 90.9 | 1    |           |
|                                | Yes | 43  | 8.9   | 44  | 9.1  | 0.98 | 0.64–1.50 |
| Diabetes without complications | No  | 420 | 86.8  | 429 | 88.6 | 1    |           |
|                                | Yes | 64  | 13.2  | 55  | 11.4 | 1.20 | 0.81–1.77 |
| Peptic ulcer                   | No  | 446 | 92.2  | 456 | 94.2 | 1    |           |
|                                | Yes | 38  | 7.9   | 28  | 5.8  | 1.40 | 0.84–2.34 |
| Liver disease                  | No  | 481 | 99.4  | 481 | 99.4 | 1    |           |
|                                | Yes | 3   | 0.6   | 3   | 0.6  | 1    | 0.20–4.95 |
| Hemiplegia / Paraplegia        | No  | 484 | 100.0 | 482 | 99.6 | 1    |           |
|                                | Yes | 0   | 0.0   | 2   | 0.4  | -    | -         |
| Renal disease                  | No  | 441 | 91.1  | 449 | 92.8 | 1    |           |
|                                | Yes | 43  | 8.9   | 35  | 7.2  | 1.24 | 0.79–1.94 |
| Diabetes with complications    | No  | 465 | 96.1  | 460 | 95.1 | 1    |           |
|                                | Yes | 19  | 3.9   | 24  | 5.0  | 0.79 | 0.43–1.45 |
| Cancer                         | No  | 468 | 96.7  | 456 | 94.2 | 1    |           |
|                                | Yes | 16  | 3.3   | 28  | 5.8  | 0.57 | 0.31–1.06 |
| Leukaemia                      | No  | 482 | 99.6  | 482 | 99.6 | 1    |           |

|                      |     |     |      |     |      |      |            |
|----------------------|-----|-----|------|-----|------|------|------------|
|                      | Yes | 2   | 0.4  | 2   | 0.4  | 1.00 | 0.14–7.10  |
| Lymphoma             | No  | 482 | 99.6 | 483 | 99.8 | 1    |            |
|                      | Yes | 2   | 0.4  | 1   | 0.2  | 2.00 | 0.18–22.06 |
| Severe liver disease | No  | 484 | 100  | 483 | 99.8 | 1    |            |
|                      | Yes | 0   | 0    | 1   | 0.2  | -    | -          |
| Metastatic cancer    | No  | 451 | 93.2 | 436 | 90.0 | 1    |            |
|                      | Yes | 33  | 6.8  | 48  | 9.9  | 0.64 | 0.40–1.04  |

*†Conditional logistic regression odds ratios for cases and controls matched on age, sex and year diagnosis*

Regarding pre-existing psychiatric conditions, 1% of cases were recorded as having schizophrenia, 1% with a learning disability and 13% with anxiety or depression. None were significantly associated with early death. However, the small number of patients with 'other' psychiatric conditions had higher odds of early death (Table 3). Compared to Dukes Stage A, Dukes Stage D and unknown stage were associated with early death. Unknown histological type, unspecified anatomical site and undetermined grade were also associated with early death. Patients with a family history of colorectal cancer had lower odds of early death compared to patients without a family history (Table 4).

**Table 3: Psychiatric illness among cases and controls and associated clogit odds ratios and 95% confidence intervals**

| Characteristic      |     | Case |      | Control |      | OR   | 95% CI    |
|---------------------|-----|------|------|---------|------|------|-----------|
|                     |     | n    | %    | n       | %    |      |           |
| Learning disability | No  | 479  | 99.0 | 482     | 99.6 | 1    |           |
|                     | Yes | 5    | 1.0  | 2       | 0.4  | 1.24 | 0.85–1.79 |
| Anxiety/Depression  | No  | 419  | 86.6 | 425     | 87.8 | 1    |           |
|                     | Yes | 65   | 13.4 | 59      | 12.2 | 1.13 | 0.76–1.70 |
| Schizophrenia       | No  | 480  | 99.2 | 479     | 99.0 | 1    |           |
|                     | Yes | 4    | 0.8  | 5       | 1.0  | 0.80 | 0.22–2.98 |
| Other psychiatric   | No  | 470  | 97.1 | 480     | 99.2 | 1    |           |

|          |     |    |     |   |     |      |            |
|----------|-----|----|-----|---|-----|------|------------|
| disorder | Yes | 14 | 2.9 | 4 | 0.8 | 3.50 | 1.15–10.63 |
|----------|-----|----|-----|---|-----|------|------------|

*†*Conditional logistic regression odds ratios for cases and controls matched on age, sex and year diagnosis

**Table 4: Disease characteristics among cases and controls and associated odds ratios and 95% confidence intervals**

| Characteristic      |                | Case |      | Control |      | OR†  | 95% CI     |
|---------------------|----------------|------|------|---------|------|------|------------|
|                     |                | n    | %    | n       | %    |      |            |
| Anatomical Location | Ascending      | 52   | 10.7 | 57      | 11.8 | 1    |            |
|                     | Caecum         | 93   | 19.2 | 136     | 28.1 | 0.83 | 0.52–1.29  |
|                     | Other          | 90   | 18.6 | 93      | 19.2 | 1.19 | 0.73–1.93  |
|                     | Descending     | 29   | 6.0  | 18      | 3.7  | 1.97 | 0.97–3.99  |
|                     | Sigmoid colon  | 95   | 19.6 | 132     | 27.3 | 0.86 | 0.54–1.37  |
|                     | Not specified  | 125  | 25.8 | 48      | 9.9  | 2.96 | 1.75–5.02  |
| Histological type   | Adenocarcinoma | 256  | 52.9 | 384     | 79.3 | 1    |            |
|                     | Mucinous       | 14   | 2.9  | 28      | 5.8  | 0.91 | 0.45–1.81  |
|                     | Not specified  | 198  | 40.9 | 60      | 12.4 | 5.62 | 3.80–8.34  |
|                     | Other          | 16   | 3.3  | 12      | 2.5  | 1.68 | 0.77–3.67  |
| Metastases          | None           | 37   | 7.6  | 64      | 13.2 | 1    |            |
|                     | Bone           | 9    | 1.9  | 1       | 0.2  | 17.2 | 2.48–143.6 |
|                     | Liver          | 134  | 27.7 | 108     | 22.3 | 2.37 | 1.42–3.95  |
|                     | Lung           | 14   | 2.9  | 10      | 2.1  | 2.55 | 1.01–6.38  |
|                     | Other          | 27   | 5.6  | 23      | 4.8  | 2.17 | 1.07–4.41  |
|                     | Unknown        | 263  | 54.3 | 278     | 57.4 | 1.77 | 1.10–2.84  |
| Dukes Stage         | A              | 8    | 1.7  | 19      | 3.9  | 1    |            |
|                     | B              | 46   | 9.5  | 85      | 17.6 | 1.37 | 0.54–3.48  |
|                     | C              | 47   | 9.7  | 127     | 26.2 | 1.02 | 0.41–2.52  |

|                             |                       |     |      |     |      |      |            |
|-----------------------------|-----------------------|-----|------|-----|------|------|------------|
|                             | D                     | 160 | 33.1 | 140 | 28.9 | 2.96 | 1.23–7.14  |
|                             | Unknown               | 233 | 46.1 | 113 | 23.4 | 5.65 | 2.30–13.91 |
| Grade (differentiation)     | Well/Moderate         | 93  | 19.2 | 190 | 39.3 | 1    |            |
|                             | Poor/Undifferentiated | 40  | 8.3  | 57  | 11.8 | 1.45 | 0.89–2.36  |
|                             | Not determined        | 351 | 72.5 | 237 | 50.0 | 3.32 | 2.38–4.62  |
| Colorectal polyps           | No                    | 467 | 10.7 | 57  | 11.8 | 1    |            |
|                             | Yes                   | 17  | 19.2 | 136 | 28.1 | 0.80 | 0.42–1.54  |
| Bowel cancer family history | No                    | 459 | 25.8 | 48  | 9.9  | 1    |            |
|                             | Yes                   | 25  | 6.0  | 18  | 3.7  | 0.52 | 0.31–0.88  |

<sup>†</sup>Conditional logistic regression odds ratios for cases and controls matched on age, sex and year diagnosis

### Multivariable analysis

Unknown marital status, being single, widowed, divorced and living alone were all associated with early death compared to patients who were married/co-habiting after adjusting for other patient characteristics and co-morbidities. Regarding socio-economic status, a deprivation gradient for early death was apparent in older people living within quintile 5. This relationship existed for all patients in quintile 4. These socially deprived groups had higher odds of early death compared to the least deprived after adjusting for other factors (Table 5). Being under-weight between 1-3 years before diagnosis was significantly associated with early death in multivariable analysis. Unspecified histology and Dukes Stage D disease remained positively associated with early death in multivariable analysis.

**Table 5: Multivariable analysis of the association between patient characteristics and early death**

|  | All patients   |        |         | Male           |        |         | Female         |        |         | Aged ≥78 year       |        |         | Aged <78 year       |        |         |
|--|----------------|--------|---------|----------------|--------|---------|----------------|--------|---------|---------------------|--------|---------|---------------------|--------|---------|
|  | n <sup>#</sup> | O<br>R | 95<br>% | n <sup>#</sup> | O<br>R | 95<br>% | n <sup>#</sup> | O<br>R | 95<br>% | n <sup>#</sup><br>α | O<br>R | 95<br>% | n <sup>#</sup><br>α | O<br>R | 95<br>% |
|  |                |        |         |                |        |         |                |        |         |                     |        |         |                     |        |         |



|                                |                         |     | CI   |           |     | CI   |           |     | CI   |           |     | CI   |           |     | CI   |           |
|--------------------------------|-------------------------|-----|------|-----------|-----|------|-----------|-----|------|-----------|-----|------|-----------|-----|------|-----------|
| Marital / accommodation status | Married/co-habiting     | 371 | 1.00 |           | 248 | 1.00 |           | 123 | 1.00 |           | 125 | 1.00 |           | 246 | 1.00 |           |
|                                | Married/not co-habiting | 26  | 1.90 | 0.65-5.57 | 11  | 1.27 | 0.27-6.01 | 15  | 3.72 | 0.70-19.7 | 17  | 1.60 | 0.45-5.67 | 9   | 0.63 | 0.04-10.1 |
|                                | Institutional care      | 63  | 1.93 | 0.93-4.00 | 25  | 1.78 | 0.57-5.57 | 38  | 2.60 | 0.85-7.82 | 52  | 3.02 | 1.22-7.49 | 11  | 0.15 | 0.01-1.48 |
|                                | Unknown                 | 127 | 5.01 | 2.82-8.89 | 66  | 3.87 | 1.76-8.38 | 61  | 8.49 | 3.12-23.1 | 68  | 4.32 | 1.97-9.47 | 59  | 6.36 | 2.08-19.5 |
|                                | Living alone & SWD*     | 270 | 1.64 | 1.07-2.50 | 113 | 1.55 | 0.82-2.80 | 157 | 2.21 | 1.04-4.80 | 116 | 1.62 | 0.92-2.91 | 102 | 1.52 | 0.72-3.21 |
|                                | Other & SWD*            | 111 | 1.39 | 0.80-2.44 | 47  | 1.28 | 0.59-2.74 | 64  | 2.03 | 0.76-5.44 | 61  | 0.85 | 0.37-1.95 | 50  | 2.55 | 0.96-6.82 |
| Deprivation quintile           | Q1 Least deprived       | 153 | 1.00 |           | 87  | 1.00 |           | 66  | 1.00 |           | 83  | 1.00 |           | 70  | 1.00 |           |
|                                | Q2                      | 187 | 1.28 | 0.74-2.25 | 91  | 0.84 | 0.39-1.82 | 96  | 2.90 | 1.10-7.6  | 96  | 2.29 | 1.06-4.93 | 91  | 0.60 | 0.21-1.74 |
|                                | Q3                      | 217 | 1.42 | 0.82-2.42 | 112 | 1.28 | 0.62-2.63 | 109 | 2.54 | 0.81-5.47 | 107 | 2.05 | 0.96-4.38 | 109 | 1.29 | 0.41-2.93 |
|                                | Q4                      | 212 | 1.88 | 1.09-3.23 | 112 | 1.60 | 0.79-3.22 | 100 | 3.10 | 1.14-8.43 | 101 | 2.02 | 0.98-4.15 | 99  | 1.71 | 0.62-4.67 |

|                |                               |     |     |      |     |     |      |     |     |      |     |     |      |     |     |      |
|----------------|-------------------------------|-----|-----|------|-----|-----|------|-----|-----|------|-----|-----|------|-----|-----|------|
|                | Q5 Most deprived              | 199 | 172 | 0.98 | 108 | 113 | 0.53 | 91  | 470 | 1.68 | 92  | 264 | 1.15 | 107 | 117 | 0.43 |
|                | Being underweight (BMI <18.5) | 22  | 399 | 1.14 | 60  | 274 | 0.32 | 16  | 396 | 0.65 | 13  | 727 | 1.42 | 90  | 234 | 0.24 |
| Dukes stage    | A                             | 80  | 100 |      | 20  | 100 |      | 70  | 100 |      | 10  | 100 |      | 107 | 100 |      |
|                | B                             | 46  | 185 | 0.64 | 70  | 172 | 0.52 | 61  | 490 | 0.32 | 69  | 243 | 0.43 | 62  | 108 | 0.24 |
|                | C                             | 47  | 151 | 0.54 | 82  | 113 | 0.33 | 92  | 604 | 0.43 | 88  | 217 | 0.41 | 86  | 087 | 0.18 |
|                | D                             | 160 | 307 | 1.13 | 162 | 198 | 0.63 | 138 | 108 | 102  | 109 | 464 | 0.84 | 191 | 186 | 0.44 |
|                | Unknown                       | 233 | 299 | 1.05 | 176 | 186 | 0.56 | 160 | 158 | 106  | 215 | 427 | 0.79 | 121 | 172 | 0.34 |
| Histology type | Adenocarcinoma                | 440 | 100 |      | 352 | 100 |      | 288 | 100 |      | 296 | 100 |      | 344 | 100 |      |
|                | Mucinous                      | 42  | 120 | 0.54 | 17  | 213 | 0.59 | 25  | 087 | 0.27 | 22  | 106 | 0.35 | 20  | 098 | 0.24 |
|                | Not specified                 | 258 | 366 | 2.17 | 126 | 502 | 2.47 | 132 | 201 | 0.82 | 166 | 270 | 1.37 | 92  | 109 | 3.13 |
|                | Other                         | 28  | 116 | 0.48 | 15  | 158 | 0.44 | 13  | 076 | 0.17 | 70  | 058 | 0.09 | 21  | 149 | 0.45 |

|                 |   |    |     |   |    |     |   |    |     |   |    |     |   |    |     |
|-----------------|---|----|-----|---|----|-----|---|----|-----|---|----|-----|---|----|-----|
| Rural residence | 3 | 1. | 0.9 | 1 | 1. | 0.7 | 1 | 1. | 0.8 | 1 | 1. | 1.2 | 1 | 0. | 0.3 |
|                 | 4 | 40 | 8-  | 8 | 29 | 8-  | 6 | 53 | 6-  | 7 | 96 | 1-  | 6 | 76 | 8-  |
|                 | 4 |    | 2.0 | 2 |    | 2.1 | 2 |    | 2.7 | 8 |    | 3.1 | 6 |    | 1.5 |
|                 |   |    | 1   |   |    | 7   |   |    | 4   |   |    | 7   |   |    | 2   |

\*=SWD= single, widowed, divorced

#: n= cases and controls combined

Additional models that adjusted for pathway characteristics (attendance at A&E and number of GP consultations prior to diagnosis) did not explain the association between marital status and early death ( $p < 0.01$ ). Flu vaccination attendance and baseline consultation activity, dementia, psychiatric illness and smoking status were not significantly associated with early death in multivariable analysis.

Consistent patterns were observed among males and females when data was stratified by sex though the association between deprivation and early death was strongly pronounced among women and not present among men. Age stratification showed the odds of early death were higher for those living in rural areas compared to urban areas among patients aged  $\geq 78$  years. This association was not apparent in the younger age group. With this exception, there were only minor differences in the factors associated with early death between the two age groups (see Table 5).

## DISCUSSION

This study investigated characteristics of patients who died within three months of a diagnosis of colon cancer with the aim of identifying specific patient factors that can be addressed or accounted for to improve survival outcomes. Social isolation was identified as a common characteristic of early death in colon cancer patients. The different forms of social isolation studied included living alone and being unmarried (as opposed to co-habiting with a partner), residing in more deprived communities (as opposed to living in quintile 1-2 communities), living in a rural area when elderly (as opposed to an urban area) and having dementia or a psychiatric illness. Each of these factors was comparatively associated with early death.

Previous studies suggested that poorer outcomes for unmarried people and those living alone were mediated through weak social support<sup>28</sup>, that exerted its influence on outcomes through later presentation<sup>29</sup>. This view is consistent with several other studies that reported more negative cancer beliefs<sup>30</sup>, lower symptom awareness and greater perceived barriers to GP help-seeking among this group<sup>31</sup>. While weaker social support has previously been associated with later stage disease<sup>32, 33</sup>, in this study, despite the collection of a range of detailed pathway and treatment variables, the association between marital status, accommodation status and early death remained unexplained. Other studies suggested biopsychosocial explanations for poorer cancer outcomes in unmarried cancer patients, including chronic stress<sup>34</sup> and weaker immune response<sup>35</sup>. Marital status and accommodation status have an important association with cancer and health outcomes generally<sup>36</sup>, yet it is a research area that remains relatively under-investigated.

As in other studies, deprivation quintile was associated with early death, with a gradient in the odds of early death with increasing deprivation score<sup>4, 37, 38</sup>. However, unlike other studies this association seems restricted to women. Like marital / accommodation status, there was little evidence from this study suggesting that the association between deprivation

1  
2  
3 and early death is explained by characteristics of the pathway to diagnosis as the  
4 associations persisted after adjusting for attendance at A&E in the pathway to diagnosis,  
5 Dukes Stage and GP episodes in the three months to diagnosis. There is, of course, no  
6 direct biological basis for an association between deprivation and survival, mediating factors  
7 may include lower performance status due to higher tobacco consumption<sup>39</sup>, lower uptake of  
8 treatments due to fatalistic cancer beliefs<sup>40</sup> or differential access to services<sup>41</sup>. The  
9 association between rural residence and early death among the oldest patients was  
10 independent of deprivation and strongly significant. This is likely to relate to either isolation,  
11 access to services or both. This is a well-defined target group for early diagnosis  
12 interventions but further study is required to investigate the link between lack of social  
13 contact and cancer survival if one exists.  
14  
15  
16  
17  
18  
19  
20  
21  
22  
23  
24  
25

26 Similar to previous work on early colorectal cancer death<sup>4</sup>, a consistent feature associated  
27 with early death was that of incomplete data due to limited diagnostic testing. Missing  
28 histology, stage, grade and anatomical site may be explained by very ill patient's not  
29 receiving complete investigation. These characteristics may therefore be viewed as  
30 confounding by indication; as opposed to explaining early death, the associations are  
31 explained by early death.  
32  
33  
34  
35  
36  
37  
38  
39

40 The relationships between unknown marital, accommodation and outcomes are more  
41 difficult to explain. Despite the fact that GP records and secondary care databases were  
42 searched and the information relates to a period over a year prior to diagnosis of cancer, a  
43 strong association with early death was observed indicating the data was not missing at  
44 random. Missing data on living status, smoking status and alcohol consumption were also  
45 associated with early death in univariate analysis. Further work is required to explain this  
46 relationship with possible areas for investigation including the patient/practitioner  
47 relationship.  
48  
49  
50  
51  
52  
53  
54  
55  
56  
57  
58  
59  
60

1  
2  
3 While co-morbidity was a common feature of patients in this study we did not find it  
4 associated with dying within three months of diagnosis. Previous studies have observed that  
5 co-morbidity exerted the greatest influence in the later phases of the survival pathway<sup>42</sup>  
6 though CCI score has been observed as an independent indicator of early death elsewhere<sup>4</sup>.  
7  
8 We had matched cases and controls on age and as co-morbidity is strongly linked to age,  
9 this may have reduced our ability to detect this as an independent factor. In addition, being  
10 underweight had a strong independent association with early death. This was measured  
11 between one and three years before diagnosis and it is likely either related to disease  
12 progressing over a longer time period or to poorer performance status. However, as only 17  
13 cases were described as underweight it explains less than 4% of the total early deaths.  
14  
15  
16  
17  
18  
19  
20  
21  
22  
23

24 While the CCI was not associated with early death, dementia and other psychiatric illness,  
25 as individual co-morbid conditions were associated with early death, though in multivariable  
26 analysis these relationships did not persist. Those with dementia were more likely to have  
27 missing data on stage and anatomical location, perhaps suggesting that these patients were  
28 less likely to be investigated for their disease. Similar findings have been reported in other  
29 colon cancer studies, with dementia associated with poorer colorectal cancer outcomes,  
30 later stage disease<sup>43</sup>, and less invasive investigation<sup>44</sup>. The relationship between other  
31 psychiatric illness and early death was also attenuated by stage again suggesting a role of  
32 diagnostic intervals on the pathway to diagnosis explaining early death. Underlying causes  
33 of delay may relate to symptom recognition by carer, patient, practitioner as well as patient  
34 communication or competing health care priorities.  
35  
36  
37  
38  
39  
40  
41  
42  
43  
44  
45  
46  
47

48 A key objective of this study was to determine if patient health-seeking characteristics were  
49 associated with early death following colon cancer diagnosis. Uptake of the flu vaccine,  
50 baseline consultation activity and non-attendance at appointments were identified as three  
51 easily captured indicators of health-seeking behaviour. It was hypothesised that patients with  
52  
53  
54  
55  
56  
57  
58  
59  
60

1  
2  
3 more regular or more compliant health-seeking behaviour would have better outcomes than  
4 those without, mediated through longer diagnostic intervals and later stage disease.  
5  
6  
7

8  
9 With regard to health seeking behaviour, although attendance for the flu vaccine was  
10 inversely associated with early death, this association was not significant in multivariable  
11 analysis. While attendance for the vaccine may be considered an indicator of health  
12 compliance, it is likely to reflect various health attitudes and behaviours, with previous UK  
13 studies reporting several social and cultural factors that were associated with flu vaccination  
14 uptake as well as perception regarding health status and susceptibility to flu<sup>45</sup>. The other  
15 indicator of health seeking, frequent GP attendance, was correlated with co-morbidity in this  
16 study; a relationship reported in several other research studies<sup>10, 46</sup>.  
17  
18  
19  
20  
21  
22  
23  
24  
25

26 Although ex-smokers were identified in univariate analysis as having non-significantly lower  
27 odds of early death, this association was largely explained in the minimally adjusted model  
28 with little evidence to suggest that poorer outcomes among smokers is real. While previous  
29 studies have demonstrated a significant association between alcohol-related hospital  
30 admissions and early death following a colorectal cancer diagnosis<sup>38</sup>, this association was  
31 not observed in the current study possibly because this study was unable to discriminate  
32 between heavy and moderate alcohol use.  
33  
34  
35  
36  
37  
38  
39  
40  
41  
42

### 43 **Strengths and weaknesses**

44 The study sample was generated from a high-quality population-based cancer registry  
45 system with relatively few DCO cases<sup>47</sup> with full access to General Practice records and  
46 hospital clinical records. While missing data was a feature of the study, rather than acting as  
47 an impediment to our understanding of characteristics of early death, this appears to be one  
48 of the defining features of this patient group. Another recent study of early death has  
49 reported a similar pattern of high levels of missing data in those with the poorest outcomes<sup>4</sup>.  
50  
51  
52  
53  
54  
55  
56  
57  
58  
59  
60

1  
2  
3 However, the fact that remains that missing data was a feature of this study and potential  
4 improvements to the way data is recorded in the NICR are continuously being made.  
5  
6

7  
8  
9 The study investigated a broad range of factors that may be associated with early death and  
10 allowed for adjustment of a range of confounding factors such as co-morbidity, smoking and  
11 alcohol status.  
12  
13

14  
15  
16 The recording of the patient characteristics that vary over time at between one and three  
17 years before diagnosis was an important feature of the study design. Cancer diagnosis has  
18 been previously identified as being associated with changes in health-seeking behaviour, co-  
19 morbidity, BMI and lifestyle factors. Recording these factors based on over one year before  
20 diagnosis strengthens the assessment of causal inference between these variables and  
21 early death.  
22  
23  
24  
25  
26  
27

28  
29  
30 The case-control design in the study provided an efficient methodology to collect data and  
31 allowed the development of a control group that was matched on important but non-  
32 modifiable characteristics. While age, sex and year of diagnosis were fixed in the current  
33 study, their interaction with diagnostic pathway features and other characteristics could not  
34 be investigated. Previous studies have shown longer diagnostic timelines, later stage  
35 disease at diagnosis, lower symptom awareness and more negative cancer beliefs to be  
36 variable depending on age<sup>48</sup> and sex<sup>49</sup>. In addition, the matching on age may have reduced  
37 variation in other characteristics such as co-morbidity. The study population was also  
38 selected in a period before the introduction of screening, therefore all patients in both the  
39 case and control group were clinically diagnosed. While bowel screening was introduced in  
40 NI in 2011<sup>23</sup> and now represents an important pathway in cancer diagnosis, the majority of  
41 patients are still diagnosed clinically and the early clinical detection with symptoms remains  
42 both important and relevant.  
43  
44  
45  
46  
47  
48  
49  
50  
51  
52  
53  
54  
55  
56  
57



1  
2  
3 The use of a control group of longer survivors provided useful comparative information to  
4 investigate risk of early death, with the choice of a control sample of deceased colon cancer  
5 patients removing any risk of consent bias from the study. However, while a buffer of three  
6 months was placed between cases and controls to allow better discrimination between the  
7 two, the survival of controls was restricted to a population of patients whose survival was  
8 less than three years and perhaps not that dissimilar to the case population. Despite this, the  
9 study was able to identify several characteristics which discriminated between cases and  
10 controls suggesting that the patients who die within the first few months of diagnosis are a  
11 specific patient cohort who require specific attention.  
12  
13  
14  
15  
16  
17  
18  
19  
20  
21

## 22 **CONCLUSIONS**

23  
24 This comprehensive study of early death from colon cancer has identified several population  
25 sub-groups that warrant special attention. These include those who are single, living alone,  
26 older people living in rural environments, and people from the most deprived communities as  
27 well as those living in residential or nursing care. These likely comprise some of the most  
28 isolated people in society. However, while the aforementioned variables are an indicator of  
29 social isolation, this study was not designed to actually *investigate* isolation (i.e. lack of  
30 social contact or poor social support networks). Therefore, further study is required to  
31 confirm that social isolation is definitely linked with poor cancer survival outcomes. In  
32 addition, further studies are required to better understand the role of missing data in patient  
33 records. Finally, additional work ought to be undertaken to determine if these patterns are  
34 consistent in other ICBP countries.  
35  
36  
37  
38  
39  
40  
41  
42  
43  
44  
45  
46  
47  
48  
49  
50  
51  
52  
53  
54  
55  
56  
57  
58  
59  
60

## ACKNOWLEDGEMENTS

The authors gratefully appreciate the contribution of data abstractors: Donna Floyd, Rosemary Ward, Jacqui Napier, Kate Donnelly and Bríd Morris. The authors also thank Business Services Organisation, Health & Social Care NI for facilitating the note review.

## FUNDING

The TEDI study was funded by the Cancer Research UK led National Awareness & Early Diagnosis Initiative. The Northern Ireland Cancer Registry is funded by the Public Health Agency Northern Ireland.

## DATA SHARING

Data from the TEDI study is available from the N. Ireland Cancer Registry with approval from the data custodian. Interested parties should contact Dr Anna Gavin, Director, N. Ireland Cancer Registry.

## COMPETING INTERESTS

There are no competing interests to be reported by the authors in this study

## CONTRIBUTOR STATEMENT

CD designed the study, undertook all statistical analysis and drafted the manuscript. NH was medical adviser for the study, provided advice on statistical analysis and interpretation and contributed to the writing of the manuscript. AM contributed to the writing, editing and submission of the paper. MD provided advice and guidance on the study design and contributed to writing of the manuscript. LA provided advice and guidance on the study design and contributed to writing of the manuscript. LR contributed to the study design, development of data collection forms and data abstractor training and analysis and

1  
2  
3 interpretation of results. AG was Principal Investigator, funding recipient and contributed to  
4  
5 the writing of the manuscript.

## 6 7 REFERENCES

- 8  
9  
10  
11 1 Coleman MP, Forman D, Bryant H, Butler J, Rachet B, Maringe C, Nur U, Tracey E,  
12 Coory M, Hatcher J, McGahan CE, Turner D, Marrett L, Gjerstorff ML, Johannesen TB,  
13 Adolfsson J, Lambe M, Lawrence G, Meechan D, Morris EJ, Middleton R, Steward J,  
14 Richards MA; ICBP Module 1 Working Group. Cancer survival in Australia, Canada,  
15 Denmark, Norway, Sweden, and the UK, 1995-2007 (the International Cancer  
16 Benchmarking Partnership): an analysis of population-based cancer registry data.  
17 *Lancet*. 2011 Jan 8;377(9760):127-38.  
18  
19  
20  
21  
22  
23  
24 2 De Angelis, R., Sant, M., Coleman, M.P., Francisci, S., Baili, P., Pierannunzio, D.,  
25 Trama, A., Visser, O., Brenner, H., Ardanaz, E. and Bielska-Lasota, M., 2014. Cancer  
26 survival in Europe 1999–2007 by country and age: results of EURO CARE-5—a  
27 population-based study. *The lancet oncology*, 15(1), pp.23-34.  
28  
29  
30  
31  
32  
33 3 Morris EJ, Sandin F, Lambert PC, Bray F, Klint A, Linklater K, Robinson D, Pahlman L,  
34 Holmberg L, Møller H. A population-based comparison of the survival of patients with  
35 colorectal cancer in England, Norway and Sweden between 1996 and 2004. *Gut*. 2011  
36 Feb 8.  
37  
38  
39  
40  
41 4 Downing, A., Aravani, A., Macleod, U., Oliver, S., Finan, P.J., Thomas, J.D., Quirke,  
42 P., Wilkinson, J.R. and Morris, E.J.A., 2013. Early mortality from colorectal cancer in  
43 England: a retrospective observational study of the factors associated with death in the  
44 first year after diagnosis. *British journal of cancer*, 108(3), pp.681-685.  
45  
46  
47  
48 5 Northern Ireland Cancer Registry. Official Statistics on cancer incidence and survival:  
49 All Cancers (Excluding Non Melanoma Skin Cancer) 2015.  
50 [http://www.qub.ac.uk/researchcentres/nicr/FileStore/PDF/FactSheets/Filetoupload,531](http://www.qub.ac.uk/researchcentres/nicr/FileStore/PDF/FactSheets/Filetoupload,531393,en.pdf)  
51 [393,en.pdf](http://www.qub.ac.uk/researchcentres/nicr/FileStore/PDF/FactSheets/Filetoupload,531393,en.pdf).  
52  
53  
54  
55  
56  
57  
58  
59  
60

- 1  
2  
3 6 Thomson C S, Forman D. Cancer survival in England and the influence of early  
4 diagnosis: what can we learn from recent EURO CARE results?. *Br J Cancer*. 2009  
5 December 3; 101(Suppl 2): S102–S109.  
6  
7  
8  
9 7 Sogaard, M., Thomsen, R.W., Bossen, K.S., Sorensen, H.T. and Norgaard, M., 2013.  
10 The impact of comorbidity on cancer survival: a review. *Clin Epidemiol*, 5(Suppl 1),  
11 pp.3-29.  
12  
13  
14 8 Genevieve M. Boland, George J. Chang, Alex B. Haynes, Yi-Ju Chiang, Ryaz  
15 Chagpar, Yan Xing, Chung-Yuan Hu, Barry W. Feig, Y. Nancy You, Janice N. Cormier.  
16 Association between Adherence to National Comprehensive Cancer Network  
17 Treatment Guidelines and Improved Survival in Patients with Colon Cancer. *Cancer*.  
18 2013 April 15; 119(8): 1593–1601.  
19  
20  
21  
22  
23  
24 9 Mitchell, E., Macdonald, S., Campbell, N.C., Weller, D. and Macleod, U., 2008.  
25 Influences on pre-hospital delay in the diagnosis of colorectal cancer: a systematic  
26 review. *British journal of cancer*, 98(1), pp.60-70.  
27  
28  
29  
30  
31 10 Marshall JR, Funch DP (1986) Gender and illness behavior among colorectal cancer  
32 patients. *Women and Health* 11(3 – 4): 67 – 82  
33  
34  
35 11 Mariscal M, Llorca J, Prieto D, Delgado-Rodriguez M (2001) Determinants of the  
36 interval between the onset of symptoms and diagnosis in patients with digestive tract  
37 cancers. *Cancer Detect Prevent* 25(5): 420 – 429  
38  
39  
40  
41 12 McCaffery K, Wardle J, Waller J (2003) Knowledge, attitudes, and behavioural  
42 intentions in relation to the early detection of colorectal cancer in the United Kingdom.  
43 *Prev Med* 36: 525 – 535  
44  
45  
46 13 Robinson E, Mohilever J, Zidan J, Sapir D (1986) Colorectal cancer: incidence, delay  
47 in diagnosis and stage of disease. *Eur J Cancer Clin Oncol* 22(2): 157 – 161  
48  
49  
50  
51 14 Bain NSC, Campbell NC, Ritchie LD, Cassidy J (2002) Striking the right balance in  
52 colorectal cancer – a qualitative study of rural and urban patients. *Fam Pract* 19(4):  
53 369 – 374  
54  
55  
56  
57  
58  
59  
60

- 1  
2  
3 15 Holliday HW, Hardcastle JD (1979) Delay in diagnosis and treatment of symptomatic  
4 colorectal cancer. *Lancet* 1: 309 – 311  
5  
6  
7 16 MacAdam DB (1979) A study in general practice of the symptoms and delay patterns  
8 in the diagnosis of gastrointestinal cancer. *J R Coll Gen Pract* 29: 723 – 729  
9  
10  
11 17 Mor V, Masterson-Allen S, Goldberg R, Guadagnoli E, Wool MS (1990) Prediagnostic  
12 symptom recognition and help-seeking among cancer patients. *J Community Health*  
13  
14 15(4): 253 – 266  
15  
16  
17 18 Curless R, French JM, Williams GV, James OFW (1994) Colorectal carcinoma: do  
18 elderly patients present differently? *Age Ageing* 23: 102 – 107  
19  
20  
21 19 Mitchell E, Macdonald S, Campbell NC, Weller D, Macleod U (2008) Influences on pre-  
22 hospital delay in the diagnosis of colorectal cancer: a systematic review. *Br J Cancer*  
23  
24 98: 60 – 70  
25  
26  
27 20 Nilsson E, Bolin S, Sjodahl R (1982) Carcinoma of the colon and rectum. Delay in  
28 diagnosis. *Acta Chir Scand* 148: 617 – 622  
29  
30  
31 21 Roncoroni L, Pietra N, Violi V, Sarli L, Choua O, Peracchia A (1999) Delay in the  
32 diagnosis and outcome of colorectal cancer: a prospective study. *Eur J Surg Oncol* 25:  
33  
34 173 – 178  
35  
36  
37 22 Weller, D., Coleman, D., Robertson, R., Butler, P., Melia, J., Campbell, C., Parker, R.,  
38 Patnick, J. and Moss, S., 2007. The UK colorectal cancer screening pilot: results of the  
39 second round of screening in England. *British journal of cancer*, 97(12), pp.1601-1605.  
40  
41  
42 23 Bradley DT, Treanor C, McMullan C, Owen T, Graham A, Anderson D. Reasons for  
43 non-participation in the Northern Ireland Bowel Cancer Screening Programme: a  
44 qualitative study. *BMJ Open*. 2015 Sep 9;5(9).  
45  
46  
47  
48 24 Elliss-Brookes, L., McPhail, S., Ives, A., Greenslade, M., Shelton, J., Hiom, S. and  
49 Richards, M., 2012. Routes to diagnosis for cancer—determining the patient journey  
50 using multiple routine data sets. *British Journal of Cancer*, 107(8), pp.1220-1226.  
51  
52  
53  
54 25 Weller, D., Vedsted, P., Rubin, G., Walter, F.M., Emery, J., Scott, S., Campbell, C.,  
55 Andersen, R.S., Hamilton, W., Olesen, F. and Rose, P., 2012. The Aarhus statement:  
56  
57  
58

- 1  
2  
3 improving design and reporting of studies on early cancer diagnosis. *British Journal of*  
4 *Cancer*, 106(7), pp.1262-1267.
- 5  
6  
7 26 Lunt M. Optimal matching for case control studies, Computer program and  
8 documentation for use with Stata statistical software. Available at  
9 <http://personalpages.manchester.ac.uk/staff/mark.lunt/optmatch2.hlp>; 2007. p. 1.2,  
10 Accessed 24/12/2011.
- 11  
12  
13  
14  
15 27 Rosenbaum P.R., Optimal matching for observational studies, *J Am Stat Assoc* (1989),  
16 pp. 1024–1032.
- 17  
18  
19 28 Villingshøj M, Ross L, Thomsen BL, Johansen C. Does marital status and altered  
20 contact with the social network predict colorectal cancer survival? *Eur J Cancer*. 2006  
21 Nov;42(17):3022-7.
- 22  
23  
24  
25 29 Mitchell, E.D., Pickwell-Smith, B. and Macleod, U., 2015. Risk factors for emergency  
26 presentation with lung and colorectal cancers: a systematic review. *BMJ open*, 5(4),  
27 p.e006965.
- 28  
29  
30  
31 30 Quaife, S.L., Winstanley, K., Robb, K.A., Simon, A.E., Ramirez, A.J., Forbes, L.J.,  
32 Brain, K.E., Gavin, A. and Wardle, J., 2015. Socioeconomic inequalities in attitudes  
33 towards cancer: an international cancer benchmarking partnership study. *European*  
34 *Journal of Cancer Prevention*, 24(3), p.253.
- 35  
36  
37  
38  
39 31 Niksic, M., Rachet, B., Warburton, F.G., Wardle, J., Ramirez, A.J. and Forbes, L.J.L.,  
40 2015. Cancer symptom awareness and barriers to symptomatic presentation in  
41 England—are we clear on cancer?. *British journal of cancer*, 113(3), pp.533-542.
- 42  
43  
44  
45 32 Aizer AA, Chen MH, McCarthy EP, Mendu ML, Koo S, Wilhite TJ, Graham PL,  
46 Choueiri TK, Hoffman KE, Martin NE, Hu JC, Nguyen PL. Marital status and survival in  
47 patients with cancer. *J Clin Oncol*. 2013;31:3869–3876.
- 48  
49  
50  
51 33 Nayeri K, Pitaro G, Feldman JG. Marital status and stage at diagnosis in cancer. *New*  
52 *York state journal of medicine*. 1992;92:8–11.
- 53  
54  
55  
56  
57  
58  
59  
60

- 1  
2  
3 34 Levy SM, Herberman RB, Whiteside T, Sanzo K, Lee J, Kirkwood J. Perceived social  
4 support and tumor estrogen/progesterone receptor status as predictors of natural killer  
5 cell activity in breast cancer patients. *Psychosomatic medicine*. 1990;52:73–85.  
6  
7  
8  
9 35 Hamilton TD, Leugner D, Kopciuk K, Dixon E, Sutherland FR, Bathe OF. Identification  
10 of prognostic inflammatory factors in colorectal liver metastases. *BMC Cancer*.  
11 2014;14:542.  
12  
13  
14 36 Berkman, L.F., 1995. The role of social relations in health promotion. *Psychosomatic*  
15 *medicine*, 57(3), pp.245-254  
16  
17  
18 37 Henrik Møller, Fredrik Sandin, David Robinson, Freddie Bray, d, Åsa Klint, Karen M.  
19 Linklater, Paul C. Lambert, g, Lars Pålmanh, Lars Holmberg, j, Eva Morris. Colorectal  
20 cancer survival in socioeconomic groups in England: Variation is mainly in the short  
21 term after diagnosis. *Eur J Cancer*. Volume 48, Issue 1, January 2012, Pages 46–53.  
22  
23  
24  
25 38 D H Brewster, D I Clark, D L Stockton, A J Munro, R J C Steele. Characteristics of  
26 patients dying within 30 days of diagnosis of breast or colorectal cancer in Scotland,  
27 2003–2007. *Br J Cancer*. 2011 January 4; 104(1): 60–67.  
28  
29  
30  
31 39 Munro, A.J., Bentley, A.H.M., Ackland, C. and Boyle, P.J., 2006. Smoking  
32 compromises cause-specific survival in patients with operable colorectal  
33 cancer. *Clinical Oncology*, 18(6), pp.436-440.  
34  
35  
36  
37 40 Beeken, R.J., Simon, A.E., von Wagner, C., Whitaker, K.L. and Wardle, J., 2011.  
38 Cancer fatalism: deterring early presentation and increasing social  
39 inequalities?. *Cancer Epidemiology Biomarkers & Prevention*, 20(10), pp.2127-2131.  
40  
41  
42  
43 41 Raine, R., Wong, W., Scholes, S., Ashton, C., Obichere, A. and Ambler, G., 2010.  
44 Social variations in access to hospital care for patients with colorectal, breast, and lung  
45 cancer between 1999 and 2006: retrospective analysis of hospital episode  
46 statistics. *Bmj*, 340, p.b5479.  
47  
48  
49  
50  
51  
52  
53  
54  
55  
56  
57  
58  
59  
60

- 1  
2  
3 42 Sogaard, M., Thomsen, R.W., Bossen, K.S., Sorensen, H.T. and Norgaard, M., 2013.  
4 The impact of comorbidity on cancer survival: a review. *Clin Epidemiol*, 5(Suppl 1),  
5 pp.3-29.  
6  
7  
8  
9 43 Gupta SK, Lamont EB. Patterns of presentation, diagnosis, and treatment in older  
10 patients with colon cancer and comorbid dementia. *J Am Geriatr Soc* 2004; 52:1681–  
11 1687.  
12  
13  
14 44 Raji, M.A., Kuo, Y.F., Freeman, J.L. and Goodwin, J.S., 2008. Effect of a dementia  
15 diagnosis on survival of older patients after a diagnosis of breast, colon, or prostate  
16 cancer: implications for cancer care. *Archives of internal medicine*, 168(18), pp.2033-  
17 2040.  
18  
19  
20 45 Nagata, J.M., Hernández-Ramos, I., Kurup, A.S., Albrecht, D., Vivas-Torrealba, C. and  
21 Franco-Paredes, C., 2013. Social determinants of health and seasonal influenza  
22 vaccination in adults  $\geq$  65 years: a systematic review of qualitative and quantitative  
23 data. *BMC Public Health*, 13(1), p.1.  
24  
25  
26 46 van Oostrom, S.H., Picavet, H.S.J., de Bruin, S.R., Stirbu, I., Korevaar, J.C.,  
27 Schellevis, F.G. and Baan, C.A., 2014. Multimorbidity of chronic diseases and health  
28 care utilization in general practice. *BMC family practice*, 15(1), p.1.  
29  
30  
31 47 Kearney, TM, Donnelly, C, Kelly, JM, O'Callaghan, EP, Fox, CR & Gavin, AT 2015,  
32 'Validation of the completeness and accuracy of the Northern Ireland Cancer Registry'  
33 *Cancer Epidemiology*, vol 39, no. 3, pp. 401-404.  
34  
35  
36 48 Forbes LJ, Simon AE, Warburton F, Boniface D, Brain KE, Dessaix A, Donnelly  
37 C, Haynes K, Hvidberg L, Lagerlund M, Lockwood G, Tishelman C, Vedsted P,  
38 Vigmostad MN, Ramirez AJ, Wardle J; International Cancer Benchmarking Partnership  
39 Module 2 Working Group. Differences in cancer awareness and beliefs between  
40 Australia, Canada, Denmark, Norway, Sweden and the UK(the International Cancer  
41 Benchmarking Partnership): do they contribute to differences in cancer survival? *Br J*  
42 *Cancer*. 2013 Feb 5;108(2):292-300.  
43  
44  
45  
46  
47  
48  
49  
50  
51  
52  
53  
54  
55  
56  
57  
58  
59  
60



- 1  
2  
3 49 Evans REC, Brotherstone H, Miles A, Wardle J. Gender differences in early detection  
4 of cancer. J Mens Health Gender. 2005;2 (2:209–217).  
5  
6  
7  
8  
9  
10  
11  
12  
13  
14  
15  
16  
17  
18  
19  
20

21 **FIGURE LEGEND**  
22  
23

24 **Figure 1: case inclusions and exclusions**  
25  
26  
27  
28  
29  
30  
31  
32  
33  
34  
35  
36  
37  
38  
39  
40  
41  
42  
43  
44  
45  
46  
47  
48  
49  
50  
51  
52  
53  
54  
55  
56  
57  
58  
59  
60

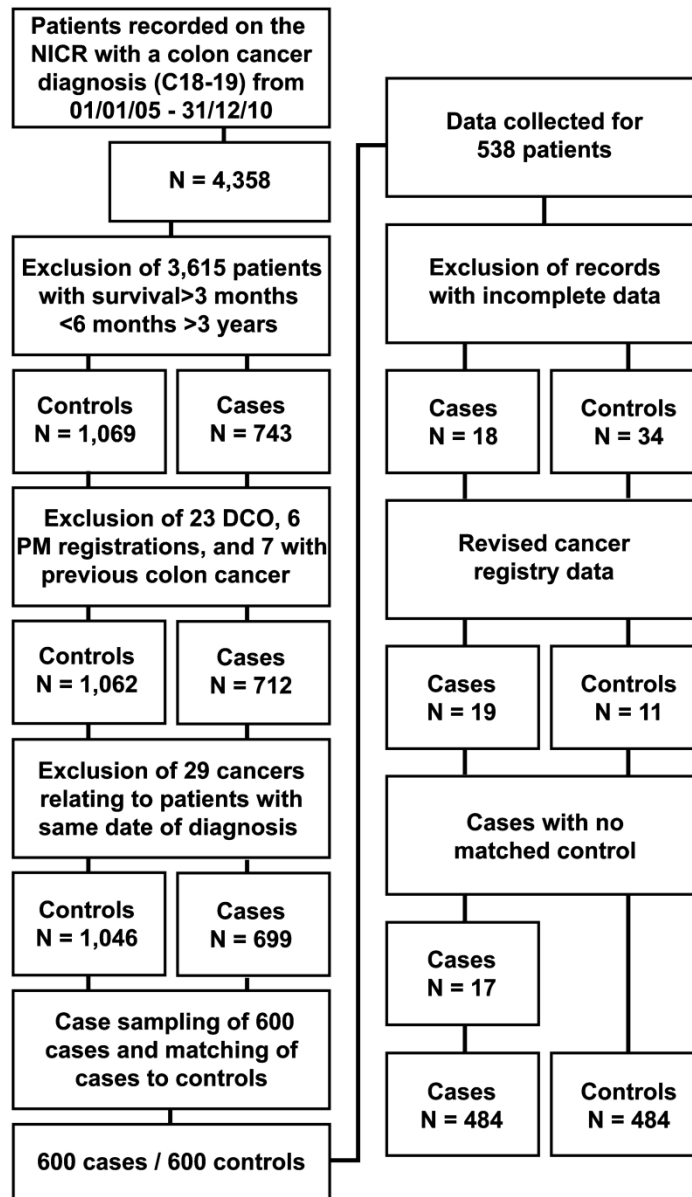

Case inclusions and exclusions

144x247mm (600 x 600 DPI)

**Supplementary Table S1: Distribution of the case sample and the remaining patients who died within three months of diagnosis who were not included in the study**

| Characteristics                                        |                    | Case Sample<br>n=484 | Cases not<br>included<br>n=196 | P value            |
|--------------------------------------------------------|--------------------|----------------------|--------------------------------|--------------------|
| Sex<br>%                                               | Male               | 52.7                 | 44.3                           | 0.05 <sup>x</sup>  |
|                                                        | Female             | 47.3                 | 55.7                           |                    |
| Year diagnosed<br>%                                    | 2005-06            | 39.2                 | 29.4                           | <0.01 <sup>x</sup> |
|                                                        | 2007-08            | 38.5                 | 18.40                          |                    |
|                                                        | 2009-10            | 22.3                 | 51.3                           |                    |
| Dukes stage<br>%                                       | A                  | 2.3                  | 1.0                            | 0.27 <sup>x</sup>  |
|                                                        | B                  | 10.1                 | 7.0                            |                    |
|                                                        | C                  | 10.7                 | 9.0                            |                    |
|                                                        | D                  | 37.0                 | 44.3                           |                    |
|                                                        | Unknown            | 39.9                 | 38.8                           |                    |
| Deprivation quintile<br>%                              | 1 (least deprived) | 16.6                 | 15.2                           | 0.87 <sup>x</sup>  |
|                                                        | 2                  | 20.9                 | 22.7                           |                    |
|                                                        | 3                  | 17.4                 | 18.7                           |                    |
|                                                        | 4                  | 24.8                 | 21.7                           |                    |
|                                                        | 5 (most deprived)  | 20.3                 | 21.7                           |                    |
| Mean age at diagnosis in years<br>(Standard deviation) |                    | 76.5<br>(10.6)       | 77.6<br>(10.3)                 | 0.83 <sup>t</sup>  |
| Mean survival duration in days<br>(Standard deviation) |                    | 36.7<br>(24.7)       | 33.8<br>(39.9)                 | 0.82 <sup>β</sup>  |

*P-values presented for chi squared tests ( $\chi$ ), t-tests ( $t$ ) and Kaplan Meier ( $\beta$ )*

**STROBE 2007 (v4) checklist of items to be included in reports of observational studies in epidemiology\***  
**Checklist for cohort, case-control, and cross-sectional studies (combined)**

| Section/Topic             | Item # | Recommendation                                                                                                                                                                                                                                                                                                                                                                                                                                                         | Reported on page # |
|---------------------------|--------|------------------------------------------------------------------------------------------------------------------------------------------------------------------------------------------------------------------------------------------------------------------------------------------------------------------------------------------------------------------------------------------------------------------------------------------------------------------------|--------------------|
| Title and abstract        | 1      | (a) Indicate the study's design with a commonly used term in the title or the abstract                                                                                                                                                                                                                                                                                                                                                                                 | 1                  |
|                           |        | (b) Provide in the abstract an informative and balanced summary of what was done and what was found                                                                                                                                                                                                                                                                                                                                                                    | 2                  |
| <b>Introduction</b>       |        |                                                                                                                                                                                                                                                                                                                                                                                                                                                                        |                    |
| Background/rationale      | 2      | Explain the scientific background and rationale for the investigation being reported                                                                                                                                                                                                                                                                                                                                                                                   | 4                  |
| Objectives                | 3      | State specific objectives, including any pre-specified hypotheses                                                                                                                                                                                                                                                                                                                                                                                                      | 5                  |
| <b>Methods</b>            |        |                                                                                                                                                                                                                                                                                                                                                                                                                                                                        |                    |
| Study design              | 4      | Present key elements of study design early in the paper                                                                                                                                                                                                                                                                                                                                                                                                                | 2 & 5              |
| Setting                   | 5      | Describe the setting, locations, and relevant dates, including periods of recruitment, exposure, follow-up, and data collection                                                                                                                                                                                                                                                                                                                                        | 2 & 5              |
| Participants              | 6      | (a) <i>Cohort study</i> —Give the eligibility criteria, and the sources and methods of selection of participants. Describe methods of follow-up<br><i>Case-control study</i> —Give the eligibility criteria, and the sources and methods of case ascertainment and control selection. Give the rationale for the choice of cases and controls<br><i>Cross-sectional study</i> —Give the eligibility criteria, and the sources and methods of selection of participants | 5                  |
|                           |        | (b) <i>Cohort study</i> —For matched studies, give matching criteria and number of exposed and unexposed<br><i>Case-control study</i> —For matched studies, give matching criteria and the number of controls per case                                                                                                                                                                                                                                                 | 5                  |
| Variables                 | 7      | Clearly define all outcomes, exposures, predictors, potential confounders, and effect modifiers. Give diagnostic criteria, if applicable                                                                                                                                                                                                                                                                                                                               | 6                  |
| Data sources/ measurement | 8*     | For each variable of interest, give sources of data and details of methods of assessment (measurement). Describe comparability of assessment methods if there is more than one group                                                                                                                                                                                                                                                                                   | 6                  |
| Bias                      | 9      | Describe any efforts to address potential sources of bias                                                                                                                                                                                                                                                                                                                                                                                                              | 6-7                |
| Study size                | 10     | Explain how the study size was arrived at                                                                                                                                                                                                                                                                                                                                                                                                                              | 6                  |
| Quantitative variables    | 11     | Explain how quantitative variables were handled in the analyses. If applicable, describe which groupings were chosen and why                                                                                                                                                                                                                                                                                                                                           | 6-7                |
| Statistical methods       | 12     | (a) Describe all statistical methods, including those used to control for confounding                                                                                                                                                                                                                                                                                                                                                                                  | 6-7                |
|                           |        | (b) Describe any methods used to examine subgroups and interactions                                                                                                                                                                                                                                                                                                                                                                                                    | 7                  |
|                           |        | (c) Explain how missing data were addressed                                                                                                                                                                                                                                                                                                                                                                                                                            | 6, 16              |
|                           |        | (d) <i>Cohort study</i> —If applicable, explain how loss to follow-up was addressed<br><i>Case-control study</i> —If applicable, explain how matching of cases and controls was addressed                                                                                                                                                                                                                                                                              | 5                  |

|                          |     |                                                                                                                                                                                                              |           |
|--------------------------|-----|--------------------------------------------------------------------------------------------------------------------------------------------------------------------------------------------------------------|-----------|
|                          |     | <i>Cross-sectional study</i> —If applicable, describe analytical methods taking account of sampling strategy                                                                                                 |           |
|                          |     | (e) Describe any sensitivity analyses                                                                                                                                                                        | -         |
| <b>Results</b>           |     |                                                                                                                                                                                                              |           |
| Participants             | 13* | (a) Report numbers of individuals at each stage of study—eg numbers potentially eligible, examined for eligibility, confirmed eligible, included in the study, completing follow-up, and analysed            | 4         |
|                          |     | (b) Give reasons for non-participation at each stage                                                                                                                                                         | Fig 1     |
|                          |     | (c) Consider use of a flow diagram                                                                                                                                                                           | Fig 1     |
| Descriptive data         | 14* | (a) Give characteristics of study participants (eg demographic, clinical, social) and information on exposures and potential confounders                                                                     | Table 1   |
|                          |     | (b) Indicate number of participants with missing data for each variable of interest                                                                                                                          | Table 1-4 |
|                          |     | (c) <i>Cohort study</i> —Summarise follow-up time (eg, average and total amount)                                                                                                                             |           |
| Outcome data             | 15* | <i>Cohort study</i> —Report numbers of outcome events or summary measures over time                                                                                                                          |           |
|                          |     | <i>Case-control study</i> —Report numbers in each exposure category, or summary measures of exposure                                                                                                         | Table 1-4 |
|                          |     | <i>Cross-sectional study</i> —Report numbers of outcome events or summary measures                                                                                                                           |           |
| Main results             | 16  | (a) Give unadjusted estimates and, if applicable, confounder-adjusted estimates and their precision (eg, 95% confidence interval). Make clear which confounders were adjusted for and why they were included | Table 1-6 |
|                          |     | (b) Report category boundaries when continuous variables were categorized                                                                                                                                    | Table 1-4 |
|                          |     | (c) If relevant, consider translating estimates of relative risk into absolute risk for a meaningful time period                                                                                             |           |
| Other analyses           | 17  | Report other analyses done—eg analyses of subgroups and interactions, and sensitivity analyses                                                                                                               | Table 5   |
| <b>Discussion</b>        |     |                                                                                                                                                                                                              |           |
| Key results              | 18  | Summarise key results with reference to study objectives                                                                                                                                                     | 15        |
| Limitations              | 19  | Discuss limitations of the study, taking into account sources of potential bias or imprecision. Discuss both direction and magnitude of any potential bias                                                   | 18-19     |
| Interpretation           | 20  | Give a cautious overall interpretation of results considering objectives, limitations, multiplicity of analyses, results from similar studies, and other relevant evidence                                   | 19-20     |
| Generalisability         | 21  | Discuss the generalisability (external validity) of the study results                                                                                                                                        | 19        |
| <b>Other information</b> |     |                                                                                                                                                                                                              |           |
| Funding                  | 22  | Give the source of funding and the role of the funders for the present study and, if applicable, for the original study on which the present article is based                                                | 21        |

\*Give information separately for cases and controls in case-control studies and, if applicable, for exposed and unexposed groups in cohort and cross-sectional studies.

**Note:** An Explanation and Elaboration article discusses each checklist item and gives methodological background and published examples of transparent reporting. The STROBE checklist is best used in conjunction with this article (freely available on the Web sites of PLoS Medicine at <http://www.plosmedicine.org/>, Annals of Internal Medicine at <http://www.annals.org/>, and Epidemiology at <http://www.epidem.com/>). Information on the STROBE Initiative is available at [www.strobe-statement.org](http://www.strobe-statement.org).

# BMJ Open

## Predictors of an early death in patients diagnosed with colon cancer: a retrospective case-control study in the United Kingdom

|                                 |                                                                                                                                                                                                                                                                                                                                                                                                                                                                                                                                                                             |
|---------------------------------|-----------------------------------------------------------------------------------------------------------------------------------------------------------------------------------------------------------------------------------------------------------------------------------------------------------------------------------------------------------------------------------------------------------------------------------------------------------------------------------------------------------------------------------------------------------------------------|
| Journal:                        | <i>BMJ Open</i>                                                                                                                                                                                                                                                                                                                                                                                                                                                                                                                                                             |
| Manuscript ID                   | bmjopen-2018-026057.R1                                                                                                                                                                                                                                                                                                                                                                                                                                                                                                                                                      |
| Article Type:                   | Research                                                                                                                                                                                                                                                                                                                                                                                                                                                                                                                                                                    |
| Date Submitted by the Author:   | 20-Mar-2019                                                                                                                                                                                                                                                                                                                                                                                                                                                                                                                                                                 |
| Complete List of Authors:       | Donnelly, Conan; National Cancer Registry Ireland, University of Cork<br>Hart, Nigel; Queen's University Belfast, School of Medicine, Dentistry and Biomedical Sciences - Centre for Public Health<br>McCrorie, Alan; Queen's University Belfast, Centre for Cancer Research and Cell Biology<br>Donnelly, Michael; Queen's University Belfast, Centre for Public Health<br>Anderson, Lesley; Queen's University Belfast, School of Medicine<br>Ranaghan, Lisa; Belfast Health and Social Care Trust<br>Gavin, Anna; Queen's University Belfast, N. Ireland Cancer Registry |
| <b>Primary Subject Heading</b>: | Epidemiology                                                                                                                                                                                                                                                                                                                                                                                                                                                                                                                                                                |
| Secondary Subject Heading:      | Public health                                                                                                                                                                                                                                                                                                                                                                                                                                                                                                                                                               |
| Keywords:                       | Epidemiology < ONCOLOGY, STATISTICS & RESEARCH METHODS, Gastrointestinal tumours < ONCOLOGY, Colorectal surgery < SURGERY                                                                                                                                                                                                                                                                                                                                                                                                                                                   |
|                                 |                                                                                                                                                                                                                                                                                                                                                                                                                                                                                                                                                                             |

SCHOLARONE™  
Manuscripts

1  
2 **Conan Donnelly<sup>1\*</sup>, Nigel Hart<sup>2</sup>, Alan D McCrorie<sup>3</sup> Michael Donnelly<sup>4</sup>,**  
3  
4 **Lesley A Anderson<sup>4</sup>, Lisa Ranaghan<sup>5</sup>, Anna Gavin<sup>1</sup>**

5  
6  
7 1. N. Ireland Cancer Registry, Queen's University Belfast, 2. Department of General Practice, Queen's University  
8 Belfast, 3. School of Medicine, Dentistry and Biomedical Science, Queen's University Belfast. 4. Centre for Public  
9 Health, Queen's University Belfast. 5. Belfast, Health and Social Care Trust.

10  
11  
12 \*Corresponding author: c.donnelly@nicr.ie, N.Ireland Cancer Registry, Centre for Public Health, Queen's University  
13 Belfast, Grosvenor Road, Belfast, BT12 6DP  
14  
15  
16  
17

18  
19 **TITLE: Predictors of an early death in patients diagnosed with**  
20  
21 **colon cancer: a retrospective case-control study in the United**  
22  
23 **Kingdom**

24  
25  
26 (Running title: Predictors of an early death from colon cancer)  
27  
28  
29

### 30 31 **KEY WORDS**

32  
33 Colon Cancer, Survival, health seeking, early death, early diagnosis  
34  
35  
36

### 37 38 **FUNDING**

39  
40 The TEDI study was funded by the Cancer Research UK led National Awareness & Early  
41 Diagnosis Initiative (Principal Investigator: AG, Co-Investigators: CD, NH, AM, MD, LR LA).  
42  
43 The Northern Ireland Cancer Registry is funded by the Public Health Agency Northern Ireland  
44 (Principal Investigator: AG)  
45  
46  
47  
48  
49

### 50 51 **COMPETING INTERESTS**

52  
53 There are no competing interests to be reported by the authors in this study  
54  
55

56  
57 **WORD COUNT: 3865**

58  
59  
60 **FIGURES: 1, TABLES: 5, SUPPLEMENTARY TABLES: 1**

## ABSTRACT

**OBJECTIVE:** Despite considerable improvements, five-year survival rates for colon cancer in the United Kingdom (UK) remain poor when compared with other socioeconomically similar countries. Variation in five-year survival can be partly explained by higher rates of death within three months of diagnosis in the UK. This study investigated characteristics of patients who died within three months of a diagnosis of colon cancer with the aim of identifying specific patient factors that can be addressed or accounted for to improve survival outcomes.

**DESIGN:** A retrospective case-control study design was applied with matching on age, sex and year diagnosed. Patient, disease, clinical, and service characteristics of patients diagnosed with colon cancer in a UK region (2005-2010), who survived less than three months from diagnosis (cases) were compared with patients who survived between six and thirty-six months (controls). Patient and clinical data was sourced from General Practice notes and hospital databases 1-3 years pre-diagnosis.

**RESULTS:** Being older (aged  $\geq 78$  years) and living in deprivation quintile 5 (OR=2.64, CI: 1.15-6.06), being unmarried and living alone (OR=1.64, CI: 1.07-2.50), being underweight compared to normal weight or obese (OR=3.99, CI: 1.14-14.0) and being older and living in a rural as opposed to urban area (OR=1.96, CI: 1.21-3.17) were all independent predictors of early death from colon cancer. Missing information was also associated with early death including unknown stage, histological type and marital/accommodation status after accounting for other factors.

**CONCLUSION:** Several factors typically associated with social isolation were a recurring theme in patients who died early from colon cancer death. This association is unexplained by clinical or diagnostic pathway characteristics. Socially isolated patients are a key target group to improve outcomes of the worst surviving patients, but further investigation is required to determine if being isolated itself is actually cause of early death from colon cancer.



## Strengths and limitations of this study

- The study sample was generated from a high-quality population-based cancer registry system with relatively few death certificate only (DCO) cases
- Case-control design provided an efficient method of collecting data and allowed the development of a control group that was matched on important non-modifiable characteristics
- Data used in this study predates the introduction of the national bowel cancer screening programme in this UK region which should mitigate any improvement in survival independently associated with bowel cancer screening
- Survival of controls was restricted to a population of patients whose survival was less than three years and similar to the case population
- Study identified several characteristics which discriminated between cases and controls suggesting that patients who die within the first few months of diagnosis are a specific patient cohort who require attention

## INTRODUCTION

Despite considerable improvements, United Kingdom (UK) survival rates for colon cancer remain poor by international comparison with higher five-year survival reported in Norway, Sweden, Canada and Australia<sup>1</sup> and poorer survival in the UK compared to several countries reported in Eurocare<sup>2</sup>. These deficits have largely been explained by survival at three months post diagnosis<sup>3</sup>. Patients who survive beyond this period in the UK have similar five-year survival rates to their counterparts in better performing countries<sup>1</sup>. Approximately 19% of colorectal cancer patients in the UK and 16% in the Northern Ireland (NI) died within three months of diagnosis between 2006 and 2008<sup>4-5</sup>. It was estimated that if survival in England matched that of Norway, 13.6% fewer patients would die within the three-month period<sup>3</sup>. Generally poor survival is linked with a number of factors including late stage disease at diagnosis<sup>6</sup>, poor patient fitness due to coexisting disease<sup>7</sup> and limited availability of and access to high quality investigations and treatment<sup>8</sup>.

Reasons for diagnostic delay in colorectal cancer are well documented<sup>9</sup>. Lower educational status<sup>10-11</sup> and rural residence<sup>12-13</sup> have been associated with delayed help seeking. Additionally, stronger social networks have been associated with shorter diagnostic delay<sup>14-16</sup>. Clinical characteristics also play a role. Patients with co-morbid disease<sup>11,17</sup> and/or multiple symptoms<sup>11</sup> are less likely to delay compared to those with non-specific symptoms<sup>17-18</sup>. Application of referral guidelines by General Practitioners (GPs) has been shown to reduce delay<sup>19</sup> while younger patients<sup>13,20</sup>, those of lower socio-economic status<sup>21</sup> and frequent help seekers<sup>10,16</sup> were less likely to be referred. While bowel cancer screening was introduced in the UK in 2007<sup>22</sup> and in NI in 2011<sup>23</sup>, the vast majority patients are diagnosed clinically<sup>24</sup>, therefore the role of clinical decision making in early colon cancer diagnosis remains paramount.

The relationship between these factors and surviving past the first few months following a colon cancer diagnosis has not been adequately investigated and their role in explaining international

1 survival differences requires attention. The aim of this study was to investigate patient, clinical  
2 and disease factors associated with early death in colon cancer patients in Northern Ireland  
3 and to determine factors which might help to identify subgroups in the population for early  
4 diagnosis interventions.  
5  
6  
7  
8  
9

## 10 11 12 **METHODOLOGY** 13

14 This study employed a retrospective, individually matched, case-control design involving a  
15 posthumous review of primary care physician or GP and electronic secondary care notes. The  
16 study design was guided by the principles of the Aarhus statement on early diagnosis  
17 research<sup>25</sup>. Principles adhered to in this study include items 1-4, 7-9, and 20 of the Aarhus  
18 checklist. Date of initial cancer diagnosis is defined by the Northern Ireland Cancer Registry  
19 (NICR) as date of first tissue diagnosis in secondary care, not as symptom presentation in  
20 primary and/or secondary care.  
21  
22  
23  
24  
25  
26  
27  
28  
29  
30

### 31 **Case and control definition and identification** 32

33 Cases: patients diagnosed with primary colon cancer (ICD 10: C18) in Northern Ireland  
34 between January 2005 and December 2010 (prior to introduction of national bowel cancer  
35 screening programme in this region) were identified using the NICR. Using death registrations,  
36 provided by the General Registrar Office, the status and survival of patients was determined.  
37 Cases were defined as patients with an observed survival of under 90 days following diagnosis  
38 date (as assigned by NICR). A random sample of all eligible cases was selected using random  
39 number tables based on pre-defined power calculations.  
40  
41  
42  
43  
44  
45  
46  
47  
48  
49

50 Controls: patients with an observed survival lasting over six months and less than three years  
51 leaving a three-month buffer between the survival rates of cases and controls. Controls were  
52 individually matched, using individual nearest neighbour matching<sup>26-27</sup> to cases by age (within  
53 5-year age bands), sex and year of diagnosis (within 2-year groups). In both groups, patients  
54  
55  
56  
57  
58  
59  
60

1  
2 with incident cancer identified by death certificate only (DCO) and patients with recurrence of  
3  
4 a previous incident colon cancer were excluded.  
5  
6  
7

### 8 **Exposure variables and covariates**

9  
10 Data items were identified through literature review with items and categorisation defined in  
11  
12 consultation with a clinical adviser, GP, a colorectal surgeon and an oncologist. Items were  
13  
14 classified into seven areas: demographic factors acting as a surrogate for social isolation  
15  
16 (marital status, accommodation status, NI Multiple Deprivation Measure [NI MDM quintile],  
17  
18 rural/urban status), lifestyle (smoking and alcohol status, health seeking activity including  
19  
20 uptake of flu vaccine and frequency of GP attendance) and co-morbidities (Charlson Co-  
21  
22 Morbidity score [CCI] and psychiatric illnesses). These characteristics were collected from  
23  
24 information recorded between one and three years before diagnosis. Marital and  
25  
26 accommodation status were merged in final analysis due to multicollinearity.  
27  
28  
29

30  
31 Disease characteristics included symptoms in the year to diagnosis, disease stage at  
32  
33 diagnosis with histology, morphology and grade collected from pathology records held in the  
34  
35 NICR. GP and hospital episodes [including symptoms (classified as 'vague' or 'alarm' based  
36  
37 on NICE Guidelines for Suspected Cancer Referral guidelines), clinician actions (number of  
38  
39 GP episodes before diagnosis and referral) and investigations ordered]. In addition, treatment  
40  
41 [first treatment type, treatment intent, surgical resection (y/n), radiotherapy (y/n),  
42  
43 chemotherapy (y/n)] and death information (date, place and cause of death) were also  
44  
45 collected. Data were collected by two trained data abstractors under the guidance of a  
46  
47 medically trained clinical adviser using a common bespoke proforma. Data was sourced from  
48  
49 GP records, electronic hospital records including the hospital discharge records,  
50  
51 multidisciplinary team (MDT) and oncology data systems. Assuming  $\beta=0.8$  and a 2-sided test  
52  
53 with a significance level of 5%, a sample size of N=960 (480 cases matched to 480 controls)  
54  
55 sufficiently powers this study to detect an odds ratio of 2.1 for any risk factor with a prevalence  
56  
57  
58  
59  
60

1  
2 of 5%, an odds ratio of 1.8 for any risk factor with a prevalence of 10%, and an odds ratio of  
3  
4 1.6 for any risk factor with a prevalence of 15%.

## 8 **Statistical method**

9  
10 Data was analysed using 'STATA 14 (StataCorp 2015)'. All missing data were categorised as  
11  
12 unknown and included in the analysis. Univariate analysis involved cross-tabulation of all  
13  
14 categorical variables with case/control status. Conditional logistic regression (CLR) was used  
15  
16 to produce unadjusted odds ratios and associated 95% confidence intervals to identify  
17  
18 independent factors associated with early death. Patient characteristics that were deemed to  
19  
20 be clinically significant and/or statistically significant at the  $p < 0.25$ , were included in a  
21  
22 minimally adjusted multivariable model to test independence from other co-morbidities, patient  
23  
24 and disease characteristics. Stage and pathway to diagnosis characteristics (number of A&E  
25  
26 and GP episodes in three months preceding diagnosis) were added to the models to assess  
27  
28 the degree to which they explained variation in early death among different patient groups.  
29  
30 Age (a binary classification around median age [78 years; IQR = 19] of cases) and sex  
31  
32 stratified univariate and multivariable analysis were undertaken to investigate differences in  
33  
34 patterns in early death between these groups.  
35  
36  
37  
38  
39

## 40 **Patient and public involvement**

41  
42 Members of the public including patients were not involved in the design or analysis stages of  
43  
44 this piece of non-interventional research, but research question was designed to explore  
45  
46 characteristics of patients who die early after a diagnosis of colon cancer. Ethical approval for  
47  
48 this study was granted by the Office of Research Ethics Committees Northern Ireland  
49  
50 (12/NI/0034). This committee receives input from lay member(s) of the public before reaching  
51  
52 a decision about whether or not to approve research studies.  
53  
54  
55  
56  
57  
58  
59  
60

## RESULTS

There were 4,358 colon cancer tumours between 2005 and 2010 registered by the NICR. Of these, 743 (17%) related to patients who died within 3 months of diagnosis and 1,069 related to patients who died between six months and three years. Following exclusions and sampling (Figure 1), 484 cases and the same number of matched controls were generated. There were no significant differences between cases included in the study and those not included (Supplementary Table 1) regarding stage at diagnosis, deprivation quintile, age and survival. However, the study group included significantly more males than females as well as fewer patients diagnosed in 2009 and 2010 due to resource constraints in data collection.

### Univariate analysis

Compared to married patients, odds of early death were higher among single, widowed and those with unknown marital status (Table 1). Those who lived alone, in nursing or residential care or were living with another relative were more likely to die within three months compared to those living with a spouse/partner. Odds of early death were also higher in the most deprived communities (23%) compared to the least deprived (13%) (Table 1).

**Table 1: Demographic characteristics of cases and controls and associated odds ratios for early death and 95% confidence intervals**

| Characteristic       |                     | Case |      | Control |      | OR <sup>†</sup> | 95% CI      |
|----------------------|---------------------|------|------|---------|------|-----------------|-------------|
|                      |                     | n    | %    | n       | %    |                 |             |
| Accommodation status | Spouse/ partner     | 156  | 32.2 | 233     | 48.1 | 1               |             |
|                      | Nursing/residential | 48   | 9.9  | 23      | 4.8  | 3.93            | 2.18 – 7.09 |
|                      | Sheltered dwelling  | 8    | 1.7  | 14      | 2.9  | 0.91            | 0.37 – 2.24 |
|                      | Alone               | 156  | 32.2 | 152     | 31.4 | 1.74            | 1.23 – 2.45 |
|                      | Lives with relative | 53   | 11.0 | 40      | 8.3  | 2.32            | 1.41 – 3.82 |
|                      | Unknown             | 63   | 13.0 | 22      | 4.6  | 5.32            | 3.00 – 9.43 |
| Marital status       | Married/Cohabiting  | 189  | 39.1 | 257     | 53.1 | 1               |             |

|                                          |                     |     |      |     |      |      |             |
|------------------------------------------|---------------------|-----|------|-----|------|------|-------------|
|                                          | Divorced            | 15  | 3.1  | 13  | 2.7  | 1.51 | 0.66 – 3.45 |
|                                          | Unknown             | 44  | 9.1  | 15  | 3.1  | 3.79 | 2.06 – 6.96 |
|                                          | Single              | 74  | 15.3 | 53  | 11.0 | 1.88 | 1.25 – 2.84 |
|                                          | Widowed             | 162 | 33.5 | 146 | 30.2 | 1.60 | 1.14 – 2.22 |
| Urban/rural status                       | Rural               | 178 | 63.2 | 166 | 65.7 | 1    |             |
|                                          | Urban               | 306 | 36.8 | 318 | 34.3 | 0.89 | 0.68 – 1.17 |
| Deprivation quintile                     | Q1 (least deprived) | 64  | 13.2 | 89  | 18.4 | 1    |             |
|                                          | Q2                  | 95  | 19.6 | 92  | 19.0 | 1.45 | 0.76 – 1.74 |
|                                          | Q3                  | 106 | 21.9 | 111 | 22.9 | 1.01 | 0.66 – 1.54 |
|                                          | Q4                  | 110 | 22.7 | 102 | 21.1 | 1.49 | 0.99 – 2.24 |
|                                          | Q5 (most deprived)  | 109 | 22.5 | 90  | 18.6 | 1.47 | 0.95 - 2.27 |
| Influenza vaccination uptake             | No uptake           | 71  | 14.7 | 47  | 9.7  | 1    |             |
|                                          | ≥1 vaccination      | 324 | 66.9 | 345 | 71.3 | 0.63 | 0.43-0.94   |
|                                          | Unknown             | 89  | 18.4 | 92  | 19.0 | 0.65 | 0.40-1.05   |
| Baseline consultation activity (tercile) | <11                 | 149 | 30.8 | 156 | 32.2 | 1    |             |
|                                          | 11-19               | 148 | 30.6 | 162 | 33.5 | 0.98 | 0.71-1.34   |
|                                          | ≥20                 | 187 | 38.6 | 166 | 34.3 | 1.20 | 0.87-1.67   |
| Smoking                                  | Non-smoker          | 221 | 45.7 | 219 | 15.7 | 1    |             |
|                                          | Ex-smoker           | 141 | 29.1 | 175 | 36.2 | 0.76 | 0.55 – 1.04 |
|                                          | Current smoker      | 91  | 18.8 | 76  | 15.7 | 1.19 | 0.81 – 1.75 |
|                                          | Unknown             | 31  | 6.4  | 14  | 2.9  | 2.30 | 1.16 – 4.56 |
| Alcohol Consumption                      | Current drinker     | 154 | 31.8 | 175 | 36.2 | 1    |             |
|                                          | Ex-drinker          | 31  | 6.4  | 26  | 5.4  | 1.37 | 0.78 – 2.43 |
|                                          | Never drank         | 189 | 39.1 | 191 | 39.5 | 1.13 | 0.82 – 1.55 |
|                                          | Unknown             | 110 | 22.7 | 92  | 19.0 | 1.38 | 0.96 – 1.99 |

† Conditional logistic regression odds ratios for cases and controls matched on age, sex and year diagnosed

Baseline GP consultation activity was not associated with early death. Regarding influenza vaccine uptake, it was not possible to identify patients who were invited for vaccination though based on age alone, 86% of cases were eligible. Approximately 70% took the vaccine at least once during the 1-3 years period before diagnosis; 15% did not attend for their vaccination and attendance for the remaining 18% was unknown. Patients who attended twice in the 1-3-year period before diagnosis had lower odds of early death than patients who did not attend. Smoking status was not significantly associated with early death with the exception of those who had an unknown smoking status (see Table 1).

Being underweight (BMI <18.5) was strongly associated with early death compared to patients with a normal or elevated BMI. However, obesity was not associated with early death when compared with being non-obese (Table 2). Co-morbidity was common among patients who died early. Almost three quarters (72%) had at least one co-morbidity. CCI score was, however, not associated with early death when means were compared by way of t-test (mean CCI score for cases was 4.75 compared to 4.90 for controls). Dementia was the only co-morbidity within the CCI that was associated with early death - it was present in 8% of cases compared to 4% of controls (Table 2).

**Table 2: Presence of individual co-morbidities included in the Charlson score in cases and controls and associated clogit odds ratios and 95% confidence intervals**

| Characteristic |     | Case |      | Control |      | OR   | 95% CI    |
|----------------|-----|------|------|---------|------|------|-----------|
|                |     | n    | %    | n       | %    |      |           |
| Underweight    | No  | 467  | 96.5 | 479     | 99.0 | 1    |           |
|                | Yes | 17   | 3.5  | 5       | 1.0  | 3.4  | 1.25–9.22 |
| Obese          | No  | 425  | 87.8 | 420     | 86.8 | 1    |           |
|                | Yes | 59   | 12.2 | 64      | 13.2 | 0.91 | 0.63–1.33 |
| Dementia       | No  | 445  | 91.9 | 462     | 95.5 | 1    |           |
|                | Yes | 39   | 8.1  | 22      | 4.6  | 1.85 | 1.07–3.19 |
| Hypertension   | No  | 279  | 57.6 | 260     | 53.7 | 1    |           |



|                                |     |     |       |     |      |      |           |
|--------------------------------|-----|-----|-------|-----|------|------|-----------|
|                                | Yes | 205 | 42.4  | 224 | 46.3 | 0.84 | 0.6–1.10  |
| Ischaemic heart disease        | No  | 391 | 80.8  | 386 | 79.8 | 1    |           |
|                                | Yes | 93  | 19.2  | 98  | 20.3 | 0.94 | 0.68–1.29 |
| Parkinson's Disease            | No  | 473 | 97.7  | 477 | 98.6 | 1    |           |
|                                | Yes | 11  | 2.3   | 7   | 1.5  | 1.57 | 0.61–4.05 |
| Valvular heart disease         | No  | 422 | 87.2  | 416 | 86.0 | 1    |           |
|                                | Yes | 62  | 12.8  | 68  | 14.1 | 0.89 | 0.61–1.31 |
| Myocardial Infarction          | No  | 429 | 88.6  | 436 | 90.1 | 1    |           |
|                                | Yes | 55  | 11.4  | 48  | 9.9  | 1.16 | 0.78–1.72 |
| Congestive heart failure       | No  | 459 | 94.8  | 451 | 93.2 | 1    |           |
|                                | Yes | 25  | 5.2   | 33  | 6.8  | 0.72 | 0.41–1.27 |
| Peripheral vascular disease    | No  | 452 | 93.4  | 462 | 95.5 | 1    |           |
|                                | Yes | 32  | 6.6   | 22  | 4.6  | 1.53 | 0.86–2.72 |
| Cerebrovascular disease        | No  | 433 | 89.5  | 440 | 90.9 | 1    |           |
|                                | Yes | 51  | 10.5  | 44  | 9.1  | 1.18 | 0.77–1.81 |
| COPD                           | No  | 402 | 83.1  | 397 | 82.0 | 1    |           |
|                                | Yes | 82  | 16.9  | 87  | 18.0 | 0.98 | 0.64–1.50 |
| Connective tissue disorder     | No  | 441 | 91.1  | 440 | 90.9 | 1    |           |
|                                | Yes | 43  | 8.9   | 44  | 9.1  | 0.98 | 0.64–1.50 |
| Diabetes without complications | No  | 420 | 86.8  | 429 | 88.6 | 1    |           |
|                                | Yes | 64  | 13.2  | 55  | 11.4 | 1.20 | 0.81–1.77 |
| Peptic ulcer                   | No  | 446 | 92.2  | 456 | 94.2 | 1    |           |
|                                | Yes | 38  | 7.9   | 28  | 5.8  | 1.40 | 0.84–2.34 |
| Liver disease                  | No  | 481 | 99.4  | 481 | 99.4 | 1    |           |
|                                | Yes | 3   | 0.6   | 3   | 0.6  | 1    | 0.20–4.95 |
| Hemiplegia / Paraplegia        | No  | 484 | 100.0 | 482 | 99.6 | 1    |           |
|                                | Yes | 0   | 0.0   | 2   | 0.4  | -    | -         |

|                             |     |     |      |     |      |      |            |
|-----------------------------|-----|-----|------|-----|------|------|------------|
| Renal disease               | No  | 441 | 91.1 | 449 | 92.8 | 1    |            |
|                             | Yes | 43  | 8.9  | 35  | 7.2  | 1.24 | 0.79–1.94  |
| Diabetes with complications | No  | 465 | 96.1 | 460 | 95.1 | 1    |            |
|                             | Yes | 19  | 3.9  | 24  | 5.0  | 0.79 | 0.43–1.45  |
| Cancer                      | No  | 468 | 96.7 | 456 | 94.2 | 1    |            |
|                             | Yes | 16  | 3.3  | 28  | 5.8  | 0.57 | 0.31–1.06  |
| Leukaemia                   | No  | 482 | 99.6 | 482 | 99.6 | 1    |            |
|                             | Yes | 2   | 0.4  | 2   | 0.4  | 1.00 | 0.14–7.10  |
| Lymphoma                    | No  | 482 | 99.6 | 483 | 99.8 | 1    |            |
|                             | Yes | 2   | 0.4  | 1   | 0.2  | 2.00 | 0.18–22.06 |
| Severe liver disease        | No  | 484 | 100  | 483 | 99.8 | 1    |            |
|                             | Yes | 0   | 0    | 1   | 0.2  | -    | -          |
| Metastatic cancer           | No  | 451 | 93.2 | 436 | 90.0 | 1    |            |
|                             | Yes | 33  | 6.8  | 48  | 9.9  | 0.64 | 0.40–1.04  |

† Conditional logistic regression odds ratios for cases and controls matched on age, sex and year diagnosis

Regarding pre-existing psychiatric conditions, 1% of cases were recorded as having schizophrenia, 1% with a learning disability and 13% with anxiety or depression. None were significantly associated with early death. However, the small number of patients with 'other' psychiatric conditions had higher odds of early death (Table 3). Compared to Dukes Stage A, Dukes Stage D and unknown stage were associated with early death. Unknown histological type, unspecified anatomical site and undetermined grade were also associated with early death. Patients with a family history of colorectal cancer had lower odds of early death compared to patients without a family history (Table 4).

**Table 3: Psychiatric illness among cases and controls and associated clogit odds ratios and 95% confidence intervals**

| Characteristic             |     | Case |      | Control |      | OR   | 95% CI     |
|----------------------------|-----|------|------|---------|------|------|------------|
|                            |     | n    | %    | n       | %    |      |            |
| Learning disability        | No  | 479  | 99.0 | 482     | 99.6 | 1    |            |
|                            | Yes | 5    | 1.0  | 2       | 0.4  | 1.24 | 0.85–1.79  |
| Anxiety/Depression         | No  | 419  | 86.6 | 425     | 87.8 | 1    |            |
|                            | Yes | 65   | 13.4 | 59      | 12.2 | 1.13 | 0.76–1.70  |
| Schizophrenia              | No  | 480  | 99.2 | 479     | 99.0 | 1    |            |
|                            | Yes | 4    | 0.8  | 5       | 1.0  | 0.80 | 0.22–2.98  |
| Other psychiatric disorder | No  | 470  | 97.1 | 480     | 99.2 | 1    |            |
|                            | Yes | 14   | 2.9  | 4       | 0.8  | 3.50 | 1.15–10.63 |

† Conditional logistic regression odds ratios for cases and controls matched on age, sex and year diagnosis

**Table 4: Disease characteristics among cases and controls and associated odds ratios and 95% confidence intervals**

| Characteristic      |                | Case |      | Control |      | OR†  | 95% CI    |
|---------------------|----------------|------|------|---------|------|------|-----------|
|                     |                | n    | %    | n       | %    |      |           |
| Anatomical Location | Ascending      | 52   | 10.7 | 57      | 11.8 | 1    |           |
|                     | Caecum         | 93   | 19.2 | 136     | 28.1 | 0.83 | 0.52–1.29 |
|                     | Other          | 90   | 18.6 | 93      | 19.2 | 1.19 | 0.73–1.93 |
|                     | Descending     | 29   | 6.0  | 18      | 3.7  | 1.97 | 0.97–3.99 |
|                     | Sigmoid colon  | 95   | 19.6 | 132     | 27.3 | 0.86 | 0.54–1.37 |
|                     | Not specified  | 125  | 25.8 | 48      | 9.9  | 2.96 | 1.75–5.02 |
| Histological type   | Adenocarcinoma | 256  | 52.9 | 384     | 79.3 | 1    |           |
|                     | Mucinous       | 14   | 2.9  | 28      | 5.8  | 0.91 | 0.45–1.81 |
|                     | Not specified  | 198  | 40.9 | 60      | 12.4 | 5.62 | 3.80–8.34 |

|                             |                       |     |      |     |      |      |            |
|-----------------------------|-----------------------|-----|------|-----|------|------|------------|
|                             | Other                 | 16  | 3.3  | 12  | 2.5  | 1.68 | 0.77–3.67  |
| Metastases                  | None                  | 37  | 7.6  | 64  | 13.2 | 1    |            |
|                             | Bone                  | 9   | 1.9  | 1   | 0.2  | 17.2 | 2.48-143.6 |
|                             | Liver                 | 134 | 27.7 | 108 | 22.3 | 2.37 | 1.42-3.95  |
|                             | Lung                  | 14  | 2.9  | 10  | 2.1  | 2.55 | 1.01-6.38  |
|                             | Other                 | 27  | 5.6  | 23  | 4.8  | 2.17 | 1.07-4.41  |
|                             | Unknown               | 263 | 54.3 | 278 | 57.4 | 1.77 | 1.10-2.84  |
| Dukes Stage                 | A                     | 8   | 1.7  | 19  | 3.9  | 1    |            |
|                             | B                     | 46  | 9.5  | 85  | 17.6 | 1.37 | 0.54–3.48  |
|                             | C                     | 47  | 9.7  | 127 | 26.2 | 1.02 | 0.41–2.52  |
|                             | D                     | 160 | 33.1 | 140 | 28.9 | 2.96 | 1.23–7.14  |
|                             | Unknown               | 233 | 46.1 | 113 | 23.4 | 5.65 | 2.30–13.91 |
| Grade (differentiation)     | Well/Moderate         | 93  | 19.2 | 190 | 39.3 | 1    |            |
|                             | Poor/Undifferentiated | 40  | 8.3  | 57  | 11.8 | 1.45 | 0.89-2.36  |
|                             | Not determined        | 351 | 72.5 | 237 | 50.0 | 3.32 | 2.38-4.62  |
|                             |                       |     |      |     |      |      |            |
| Colorectal polyps           | No                    | 467 | 10.7 | 57  | 11.8 | 1    |            |
|                             | Yes                   | 17  | 19.2 | 136 | 28.1 | 0.80 | 0.42–1.54  |
| Bowel cancer family history | No                    | 459 | 25.8 | 48  | 9.9  | 1    |            |
|                             | Yes                   | 25  | 6.0  | 18  | 3.7  | 0.52 | 0.31–0.88  |

† Conditional logistic regression odds ratios for cases and controls matched on age, sex and year diagnosis

### Multivariable analysis

Unknown marital status, being single, widowed, divorced and living alone were all associated with early death compared to patients who were married/co-habiting after adjusting for other patient characteristics and co-morbidities. Regarding socio-economic status, a deprivation

1  
2 gradient for early death was apparent in older people living within quintile 5. This relationship  
3  
4 existed for all patients in quintile 4. These socially deprived groups had higher odds of early  
5  
6 death compared to the least deprived after adjusting for other factors (Table 5). Being under-  
7  
8 weight between 1-3 years before diagnosis was significantly associated with early death in  
9  
10 multivariable analysis. Unspecified histology and Dukes Stage D disease remained positively  
11  
12 associated with early death in multivariable analysis. Additional models that adjusted for  
13  
14 pathway characteristics (attendance at A&E and number of GP consultations prior to  
15  
16 diagnosis) did not explain the association between marital status and early death ( $p < 0.01$ ).  
17  
18 Flu vaccination attendance and baseline consultation activity, dementia, psychiatric illness  
19  
20 and smoking status were not significantly associated with early death in multivariable analysis.  
21  
22  
23  
24  
25  
26  
27

28 **Table 5: Multivariable analysis of the association between patient characteristics and**  
29 **early death**

|                                       |                         | All patients   |      |           | Male           |      |           | Female         |      |           | Aged $\geq 78$ year         |      |           |
|---------------------------------------|-------------------------|----------------|------|-----------|----------------|------|-----------|----------------|------|-----------|-----------------------------|------|-----------|
|                                       |                         | n <sup>#</sup> | OR   | 95% CI    | n <sup>#</sup> | OR   | 95% CI    | n <sup>#</sup> | OR   | 95% CI    | n <sup>#</sup> <sup>a</sup> | OR   | 95% CI    |
| <b>Marital / accommodation status</b> | Married and co-habiting | 371            | 1.00 |           | 248            | 1.00 |           | 123            | 1.00 |           | 125                         | 1.00 |           |
|                                       | Married not co-habiting | 26             | 1.90 | 0.65-5.57 | 11             | 1.27 | 0.27-6.01 | 15             | 3.72 | 0.70-19.7 | 17                          | 1.60 | 0.45-5.67 |
|                                       | Institution care        | 63             | 1.93 | 0.93-4.00 | 25             | 1.78 | 0.57-5.57 | 38             | 2.60 | 0.85-7.82 | 52                          | 3.02 | 1.22-7.49 |
|                                       | Unknown                 | 127            | 5.01 | 2.82-8.89 | 66             | 3.87 | 1.76-8.38 | 61             | 8.49 | 3.12-23.1 | 68                          | 4.32 | 1.97-9.47 |
|                                       | Living alone & SWD*     | 270            | 1.64 | 1.07-2.50 | 113            | 1.55 | 0.86-2.80 | 157            | 2.21 | 1.01-4.80 | 168                         | 1.62 | 0.90-2.91 |
|                                       | Other & SWD*            | 111            | 1.39 | 0.80-2.44 | 47             | 1.28 | 0.59-2.74 | 64             | 2.03 | 0.76-5.44 | 61                          | 0.85 | 0.37-1.95 |

|                                         |                   |     |      |           |     |      |           |     |      |           |     |      |           |
|-----------------------------------------|-------------------|-----|------|-----------|-----|------|-----------|-----|------|-----------|-----|------|-----------|
| <b>Deprivation quintile</b>             | Q1 Least deprived | 153 | 1.00 |           | 87  | 1.00 |           | 66  | 1.00 |           | 83  | 1.00 |           |
|                                         | Q2                | 187 | 1.28 | 0.74-2.25 | 91  | 0.84 | 0.39-1.82 | 96  | 2.90 | 1.10-7.6  | 96  | 2.29 | 1.06-4.93 |
|                                         | Q3                | 217 | 1.42 | 0.83-2.42 | 112 | 1.28 | 0.62-2.63 | 105 | 2.09 | 0.81-5.4  | 107 | 2.05 | 0.96-4.38 |
|                                         | Q4                | 212 | 1.88 | 1.09-3.23 | 112 | 1.60 | 0.79-3.22 | 100 | 3.10 | 1.14-8.4  | 113 | 2.02 | 0.98-4.15 |
|                                         | Q5 Most deprived  | 199 | 1.72 | 0.98-3.02 | 108 | 1.13 | 0.53-2.33 | 91  | 4.70 | 1.68-13.2 | 92  | 2.64 | 1.15-6.06 |
| <b>Being underweight (BMI &lt;18.5)</b> |                   | 22  | 3.99 | 1.14-14.0 | 6   | 2.74 | 0.32-21.1 | 16  | 3.96 | 0.65-24.2 | 13  | 7.27 | 1.42-68.8 |
| <b>Dukes stage</b>                      | A                 | 8   | 1.00 |           | 20  | 1.00 |           | 7   | 1.00 |           | 10  | 1.00 |           |
|                                         | B                 | 46  | 1.85 | 0.64-5.32 | 70  | 1.72 | 0.52-5.67 | 61  | 4.90 | 0.32-75.1 | 69  | 2.43 | 0.43-13.7 |
|                                         | C                 | 47  | 1.51 | 0.54-4.27 | 82  | 1.13 | 0.33-3.82 | 92  | 6.04 | 0.43-83.9 | 88  | 2.17 | 0.41-11.6 |
|                                         | D                 | 160 | 3.07 | 1.13-8.38 | 162 | 1.98 | 0.63-6.21 | 138 | 13.8 | 1.02-188  | 109 | 4.64 | 0.84-25.7 |
|                                         | Unknown           | 233 | 2.99 | 1.05-8.53 | 176 | 1.86 | 0.58-6.02 | 160 | 15.8 | 1.06-236  | 215 | 4.27 | 0.79-22.9 |
| <b>Histology type</b>                   | Adeno-carcinoma   | 440 | 1.00 |           | 352 | 1.00 |           | 288 | 1.00 |           | 296 | 1.00 |           |
|                                         | Mucinous          | 42  | 1.20 | 0.54-2.66 | 17  | 2.13 | 0.59-7.64 | 25  | 0.87 | 0.27-2.72 | 22  | 1.06 | 0.35-3.27 |
|                                         | Not specified     | 258 | 3.66 | 2.17-6.17 | 126 | 5.02 | 2.47-10.2 | 132 | 2.01 | 0.82-4.90 | 166 | 2.70 | 1.37-5.31 |
|                                         | Other             | 28  | 1.16 | 0.48-2.83 | 15  | 1.58 | 0.44-5.66 | 13  | 0.76 | 0.17-3.46 | 7   | 0.58 | 0.09-3.77 |
| <b>Rural residence</b>                  |                   | 344 | 1.40 | 0.98-2.01 | 182 | 1.29 | 0.78-2.17 | 162 | 1.53 | 0.86-2.74 | 178 | 1.96 | 1.21-3.17 |

\*=SWD= single, widowed, divorced

#: n= cases and controls combined

1  
2 Consistent patterns were observed among males and females when data was stratified by sex  
3  
4 though the association between deprivation and early death was strongly pronounced among  
5  
6 women and not present among men. Age stratification showed the odds of early death were  
7  
8 higher for those living in rural areas compared to urban areas among patients aged  $\geq 78$  years.  
9  
10 This association was not apparent in those aged  $< 78$ . Otherwise, there were no significant  
11  
12 differences in the factors associated with early death between those aged  $< 78$  and those aged  
13  
14  $\geq 78$  (see Table 5 – only data for  $\geq 78$  shown).  
15  
16  
17  
18  
19  
20  
21  
22  
23  
24  
25  
26  
27  
28  
29  
30  
31  
32  
33  
34  
35  
36  
37  
38  
39  
40  
41  
42  
43  
44  
45  
46  
47  
48  
49  
50  
51  
52  
53  
54  
55  
56  
57  
58  
59  
60

For peer review only

## DISCUSSION

### Summary of findings

This study investigated characteristics of patients who died within three months of a diagnosis of colon cancer, by way of univariate and multivariate analyses, with the aim of identifying specific patient factors that can be addressed or accounted for to improve survival outcomes.

Social isolation was identified as a common characteristic of early death in colon cancer patients. The different forms of social isolation studied included living alone and being unmarried (as opposed to co-habiting with a partner), residing in more deprived communities (as opposed to living in quintile 1-2 communities), living in a rural area when elderly (as opposed to an urban area) and having dementia or a psychiatric illness. Each of these factors was comparatively associated with early death. Previous studies suggested that poorer outcomes for unmarried people and those living alone were mediated through weak social support<sup>28</sup>, that exerted its influence on outcomes through later presentation<sup>29</sup>. This view is consistent with several other studies that reported more negative cancer beliefs<sup>30</sup>, lower symptom awareness and greater perceived barriers to GP help-seeking among this group<sup>31</sup>. While weaker social support has previously been associated with later stage disease<sup>32-33</sup>, in this study, despite the collection of a range of detailed pathway and treatment variables, the association between marital status, accommodation status and early death remained unexplained. Other studies suggested biopsychosocial explanations for poorer cancer outcomes in unmarried cancer patients, including chronic stress<sup>34</sup> and weaker immune response<sup>35</sup>. Marital status and accommodation status have an important association with cancer and health outcomes generally<sup>36</sup>, yet it is a research area that remains relatively under-investigated.

As in other studies, deprivation quintile was associated with early death, with a gradient in the odds of early death with increasing deprivation score<sup>4,37-38</sup>. However, unlike other studies this association seems restricted to women. Like marital / accommodation status, there was little evidence from this study suggesting that the association between deprivation and early death



1  
2  
3 is explained by characteristics of the pathway to diagnosis as the associations persisted after  
4 adjusting for attendance at A&E in the pathway to diagnosis, Dukes Stage and GP episodes  
5 in the three months to diagnosis. There is no direct biological basis for an association between  
6 deprivation and survival. Mediating factors may include lower performance status due to  
7 higher tobacco consumption<sup>39</sup>, lower uptake of treatments due to fatalistic cancer beliefs<sup>40</sup> or  
8 differential access to services<sup>41</sup>. The association between rural residence and early death  
9 among the oldest patients was independent of deprivation and strongly significant. This is  
10 likely to relate to either isolation, access to services or both. This is a well-defined target group  
11 for early diagnosis interventions, but further study is required to investigate the link between  
12 lack of social contact and cancer survival if one exists.  
13  
14  
15  
16  
17  
18  
19  
20  
21  
22  
23  
24  
25

26 Similar to previous work on early colorectal cancer death<sup>4</sup>, a consistent feature associated  
27 with early death was that of incomplete data due to limited diagnostic testing. Missing  
28 histology, stage, grade and anatomical site may be explained by very ill patient's not receiving  
29 complete investigation. These characteristics may therefore be viewed as confounding by  
30 indication; as opposed to explaining early death, the associations are explained by early  
31 death. The relationships between unknown marital, accommodation and outcomes are more  
32 difficult to explain. Despite the fact that GP records and secondary care databases were  
33 searched, and the information relates to a period over a year prior to diagnosis of cancer, a  
34 strong association with early death was observed indicating the data was not missing at  
35 random. Missing data on living status, smoking status and alcohol consumption were also  
36 associated with early death in univariate analysis. Further work is required to explain this  
37 relationship with possible areas for investigation including the patient/practitioner relationship.  
38 While co-morbidity was a common feature of patients in this study, we did not find it associated  
39 with dying within three months of diagnosis. Previous studies have observed that co-morbidity  
40 exerted the greatest influence in the later phases of the survival pathway<sup>42</sup> though CCI score  
41 has been observed as an independent indicator of early death elsewhere<sup>4</sup>. We had matched  
42 cases and controls on age and as co-morbidity is strongly linked to age, this may have reduced  
43  
44  
45  
46  
47  
48  
49  
50  
51  
52  
53  
54  
55  
56  
57  
58  
59  
60

1  
2  
3 our ability to detect this as an independent factor. In addition, being underweight had a strong  
4 independent association with early death. This was measured between one and three years  
5 before diagnosis and it is likely either related to disease progressing over a longer time period  
6 or to poorer performance status. However, as only 17 cases were described as underweight  
7 it explains less than 4% of the total early deaths.  
8  
9  
10  
11  
12  
13

14  
15 While the CCI was not associated with early death, dementia and other psychiatric illness, as  
16 individual co-morbid conditions, were associated with early death. However, in multivariable  
17 analysis these relationships did not persist. Those with dementia were more likely to have  
18 missing data on stage and anatomical location, perhaps suggesting that these patients were  
19 less likely to be investigated for their disease. Similar findings have been reported in other  
20 colon cancer studies, with dementia associated with poorer colorectal cancer outcomes, later  
21 stage disease<sup>43</sup>, and less invasive investigation<sup>44</sup>. The relationship between other psychiatric  
22 illness and early death was also attenuated by stage again suggesting a role of diagnostic  
23 intervals on the pathway to diagnosis explaining early death. Underlying causes of delay may  
24 relate to symptom recognition by carer, patient, practitioner as well as patient communication  
25 or competing health care priorities. A key objective of this study was to determine if patient  
26 health-seeking characteristics were associated with early death following colon cancer  
27 diagnosis. Uptake of the flu vaccine, baseline consultation activity and non-attendance at  
28 appointments were identified as three easily captured indicators of health-seeking behaviour.  
29 It was hypothesised that patients with more regular or more compliant health-seeking  
30 behaviour would have better outcomes than those without, mediated through longer diagnostic  
31 intervals and later stage disease.  
32  
33  
34  
35  
36  
37  
38  
39  
40  
41  
42  
43  
44  
45  
46  
47  
48  
49  
50  
51  
52  
53

54 With regard to health seeking behaviour, although attendance for the flu vaccine was inversely  
55 associated with early death, this association was not significant in multivariable analysis. While  
56 attendance for the vaccine may be considered an indicator of health compliance, it is likely to  
57 reflect various health attitudes and behaviours, with previous UK studies reporting several  
58  
59  
60

1  
2  
3 social and cultural factors that were associated with flu vaccination uptake as well as  
4 perception regarding health status and susceptibility to flu<sup>45</sup>. The other indicator of health  
5 seeking, frequent GP attendance, was correlated with co-morbidity in this study; a relationship  
6 reported in several other research studies<sup>10,46</sup>. Although ex-smokers were identified in  
7 univariate analysis as having non-significantly lower odds of early death, this association was  
8 largely explained in the minimally adjusted model with little evidence to suggest that poorer  
9 outcomes among smokers is real. While previous studies have demonstrated a significant  
10 association between alcohol-related hospital admissions and early death following a colorectal  
11 cancer diagnosis<sup>38</sup>, this association was not observed in the current study possibly because  
12 this study was unable to discriminate between heavy and moderate alcohol use.  
13  
14  
15  
16  
17  
18  
19  
20  
21  
22  
23  
24  
25  
26

### 27 **Strengths and weaknesses**

28 The study sample was generated from a high-quality population-based cancer registry system  
29 with relatively few DCO cases<sup>47</sup> with full access to General Practice records and hospital  
30 clinical records. While missing data was a feature of the study, rather than acting as an  
31 impediment to our understanding of characteristics of early death, this appears to be one of  
32 the defining features of this patient group. Another recent study of early death has reported a  
33 similar pattern of high levels of missing data in those with the poorest outcomes<sup>4</sup>. However,  
34 the fact that remains that missing data was a feature of this study and potential improvements  
35 to the way data is recorded in the NICR are continuously being made. The study investigated  
36 a broad range of factors that may be associated with early death and allowed for adjustment  
37 of a range of confounding factors such as co-morbidity, smoking and alcohol status. We  
38 present results from both univariate and multivariate analysis but place greater emphasis upon  
39 results from multivariate analysis due to the complex nature of interacting factors causing early  
40 death from colon cancer. The recording of the patient characteristics that vary over time at  
41 between one and three years before diagnosis was an important feature of the study design.  
42 Cancer diagnosis has been previously identified as being associated with changes in health-  
43 seeking behaviour, co-morbidity, BMI and lifestyle factors. Recording these factors based on  
44  
45  
46  
47  
48  
49  
50  
51  
52  
53  
54  
55  
56  
57  
58  
59  
60

1  
2  
3 over one year before diagnosis strengthens the assessment of causal inference between  
4 variables and early death.  
5  
6  
7  
8

9 The case-control design in the study provided an efficient methodology to collect data and  
10 allowed the development of a control group that was matched on important but non-modifiable  
11 characteristics. While age, sex and year of diagnosis were fixed in the current study, their  
12 interaction with diagnostic pathway features and other characteristics could not be  
13 investigated. Previous studies have shown longer diagnostic timelines, later stage disease at  
14 diagnosis, lower symptom awareness and more negative cancer beliefs to be variable  
15 depending on age<sup>48</sup> and sex<sup>49</sup>. In addition, the matching on age may have reduced variation  
16 in other characteristics such as co-morbidity. The study population was also selected in a  
17 period before the introduction of screening, therefore all patients in both the case and control  
18 group were clinically diagnosed. While bowel screening was introduced in NI in 2011<sup>23</sup> and  
19 now represents an important pathway in cancer diagnosis, the majority of patients are still  
20 diagnosed clinically and the early clinical detection of symptoms remains both important and  
21 relevant – particularly for cancer stage and by extension, cancer survival. Future iterations of  
22 this work would likely benefit from matching of cases and controls on cancer stage in addition  
23 to age, sex, and year of diagnosis.  
24  
25  
26  
27  
28  
29  
30  
31  
32  
33  
34  
35  
36  
37  
38  
39  
40  
41  
42

43 The use of a control group of longer survivors provided useful comparative information to  
44 investigate risk of early death, with the choice of a control sample of deceased colon cancer  
45 patients removing any risk of consent bias from the study. However, while a buffer of three  
46 months was placed between cases and controls to allow better discrimination between the  
47 two, the survival of controls was restricted to a population of patients whose survival was less  
48 than three years and similar to the case population. Despite this, the study was able to identify  
49 several characteristics which discriminated between cases and controls suggesting that the  
50 patients who die within the first few months of diagnosis are a specific patient cohort who  
51 require attention.  
52  
53  
54  
55  
56  
57  
58  
59  
60

## CONCLUSIONS

This comprehensive study of early death from colon cancer has identified several population sub-groups that warrant special attention. These include those who are single, living alone, older people living in rural environments, and people from the most deprived communities as well as those living in residential or nursing care. These likely comprise some of the most isolated people in society. However, while the aforementioned variables are an indicator of social isolation, this study was not designed to actually *investigate* isolation (i.e. lack of social contact or poor social support networks). Therefore, further study is required to confirm that social isolation is definitely linked with poor cancer survival outcomes. Further studies are also required to better understand the role of missing data in patient records. Furthermore, additional work ought to be undertaken to determine if these patterns are consistent in other ICBP countries. Finally, because of increased colon cancer survival, future studies investigating risk factors for an *early death* using a case control methodology would likely benefit from comparing cases who suffer early mortality with controls who survive beyond five or perhaps even ten years as opposed to the three-year survival control group used in this study<sup>50-52</sup>.

## ACKNOWLEDGEMENTS

The authors gratefully appreciate the contribution of data abstractors: Donna Floyd, Rosemary Ward, Jacqui Napier, Kate Donnelly and Bríd Morris. The authors also thank Business Services Organisation, Health & Social Care NI for facilitating the note review.

## FUNDING

The TEDI study was funded by the Cancer Research UK led National Awareness & Early Diagnosis Initiative. The Northern Ireland Cancer Registry is funded by the Public Health Agency Northern Ireland.

## DATA SHARING

Data from the TEDI study is available from the N. Ireland Cancer Registry with approval from the data custodian. Interested parties should contact Dr Anna Gavin, Director, N. Ireland Cancer Registry.

## COMPETING INTERESTS

There are no competing interests to be reported by the authors in this study

## CONTRIBUTOR STATEMENT

CD designed the study, undertook all statistical analysis and drafted the manuscript. NH was medical adviser for the study, provided advice on statistical analysis and interpretation and contributed to the writing of the manuscript. AM contributed to the writing, editing and submission of the paper. MD provided advice and guidance on the study design and contributed to writing of the manuscript. LA provided advice and guidance on the study design and contributed to writing of the manuscript. LR contributed to the study design, development of data collection forms and data abstractor training and analysis and interpretation of results. AG was Principal Investigator, funding recipient and contributed to the writing of the manuscript.

**REFERENCES**

- 1 Coleman MP, Forman D, Bryant H, *et al.* Cancer survival in Australia, Canada, Denmark, Norway, Sweden, and the UK, 1995-2007 (the International Cancer Benchmarking Partnership): an analysis of population-based cancer registry data. *Lancet.* 2011; 377(9760): 127-138.
- 2 De Angelis R, Sant M, Coleman MP, *et al.* Cancer survival in Europe 1999–2007 by country and age: results of EUROCORE-5—a population-based study. *Lancet Oncol.* 2014; 15(1): 23-34.
- 3 Morris EJ, Sandin F, Lambert PC, *et al.* A population-based comparison of the survival of patients with colorectal cancer in England, Norway and Sweden between 1996 and 2004. *Gut.* 2011; 60: 1087-1093.
- 4 Downing A, Aravani A, Macleod U, *et al.* Early mortality from colorectal cancer in England: a retrospective observational study of the factors associated with death in the first year after diagnosis. *Br J Cancer.* 2013; 108(3): 681-685.
- 5 Northern Ireland Cancer Registry. Official Statistics on cancer incidence and survival: All Cancers (Excluding Non-Melanoma Skin Cancer) 2015. <http://www.qub.ac.uk/researchcentres/nicr/FileStore/PDF/FactSheets/Fileupload,531393,en.pdf> (accessed 15 March 2017).
- 6 Thomson CS, Forman D. Cancer survival in England and the influence of early diagnosis: what can we learn from recent EUROCORE results?. *Br J Cancer.* 2009; 101(2): S102–S109.
- 7 Sogaard M, Thomsen RW, Bossen KS, *et al.* The impact of comorbidity on cancer survival: a review. *Clin Epidemiol.* 2013; 5(1): 3-29.
- 8 Genevieve M, Boland GJ, Chang AB, *et al.* Association between Adherence to National Comprehensive Cancer Network Treatment Guidelines and Improved Survival in Patients with Colon Cancer. *Cancer.* 2013; 119(8): 1593–1601.

- 1  
2  
3 9 Mitchell E, Macdonald S, Campbell NC, *et al.* Influences on pre-hospital delay in the  
4 diagnosis of colorectal cancer: a systematic review. *Br J Cancer*. 2008; 98(1): 60-70.  
5  
6  
7 10 Marshall JR, Funch DP. Gender and illness behaviour among colorectal cancer patients.  
8  
9  
10  
11 11 Mariscal M, Llorca J, Prieto D, *et al.* Determinants of the interval between the onset of  
12 symptoms and diagnosis in patients with digestive tract cancers. *Cancer Detect Prevent*.  
13  
14 2001; 25(5): 420–429.  
15  
16  
17 12 McCaffery K, Wardle J, Waller J. Knowledge, attitudes, and behavioural intentions in  
18 relation to the early detection of colorectal cancer in the United Kingdom. *Prev Med*.  
19  
20 2003; 36: 525–535.  
21  
22  
23 13 Robinson E, Mohilever J, Zidan J, *et al.* Colorectal cancer: incidence, delay in diagnosis  
24 and stage of disease. *Eur J Cancer Clin Oncol*. 1986; 22(2): 157–161.  
25  
26  
27 14 Bain NSC, Campbell NC, Ritchie LD, *et al.* Striking the right balance in colorectal cancer  
28 – a qualitative study of rural and urban patients. *Fam Pract*. 2002; 19(4): 369–374.  
29  
30  
31 15 Holliday HW, Hardcastle JD. Delay in diagnosis and treatment of symptomatic colorectal  
32 cancer. *Lancet*. 1979; 1: 309–311.  
33  
34  
35 16 MacAdam DB. A study in general practice of the symptoms and delay patterns in the  
36 diagnosis of gastrointestinal cancer. *J R Coll Gen Pract* 1979; 29: 723–729.  
37  
38  
39 17 Mor V, Masterson-Allen S, Goldberg R, *et al.* Prediagnostic symptom recognition and  
40 help-seeking among cancer patients. *J Community Health*. 1990; 15(4): 253–266.  
41  
42  
43 18 Curless R, French JM, Williams GV, *et al.* Colorectal carcinoma: do elderly patients  
44 present differently? *Age Ageing*. 1994; 23: 102–107.  
45  
46  
47 19 Mitchell E, Macdonald S, Campbell NC, *et al.* Influences on pre-hospital delay in the  
48 diagnosis of colorectal cancer: a systematic review. *Br J Cancer*. 2008; 98: 60–70.  
49  
50  
51 20 Nilsson E, Bolin S, Sjodahl R. Carcinoma of the colon and rectum. Delay in diagnosis.  
52  
53  
54  
55 21 Roncoroni L, Pietra N, Violi V, *et al.* Delay in the diagnosis and outcome of colorectal  
56 cancer: a prospective study. *Eur J Surg Oncol*. 1999; 25: 173–178.  
57  
58  
59  
60



- 1  
2  
3 22 Weller D, Coleman D, Robertson R, *et al.* The UK colorectal cancer screening pilot:  
4 results of the second round of screening in England. *Br J Cancer*, 2007; 97(12): 1601-  
5 1605.  
6  
7  
8  
9 23 Bradley DT, Treanor C, McMullan C, *et al.* Reasons for non-participation in the Northern  
10 Ireland Bowel Cancer Screening Programme: a qualitative study. *BMJ Open*. 2015; 5:  
11 e008266.  
12  
13  
14  
15 24 Elliss-Brookes L, McPhail S, Ives A, *et al.* Routes to diagnosis for cancer—determining  
16 the patient journey using multiple routine data sets. *Br J Cancer*. 2012; 107(8): 1220-  
17 1226.  
18  
19  
20  
21  
22 25 Weller D, Vedsted P, Rubin G, *et al.* The Aarhus statement: improving design and  
23 reporting of studies on early cancer diagnosis. *Br J Cancer*. 2012; 106(7): 1262-1267.  
24  
25  
26 26 Lunt M. Optimal matching for case control studies, Computer program and  
27 documentation for use with Stata statistical software. Available at  
28 <http://personalpages.manchester.ac.uk/staff/mark.lunt/optmatch2.hlp>; 2007 (accessed  
29 24 December 2013).  
30  
31  
32  
33  
34 27 Rosenbaum PR. Optimal matching for observational studies. *J Am Stat Assoc*. 1989;  
35 1024–1032.  
36  
37  
38  
39 28 Villingshøj M, Ross L, Thomsen BL, *et al.* Does marital status and altered contact with  
40 the social network predict colorectal cancer survival? *Eur J Cancer*. 2006; 42(17):3022-  
41 3027.  
42  
43  
44  
45 29 Mitchell ED, Pickwell-Smith B, Macleod U. Risk factors for emergency presentation with  
46 lung and colorectal cancers: a systematic review. *BMJ Open*. 2015; 5(4): e006965.  
47  
48  
49 30 Quaife SL, Winstanley K, Robb KA, *et al.* Socioeconomic inequalities in attitudes  
50 towards cancer: an international cancer benchmarking partnership study. *Eur J Can*  
51 *Prev*. 2015; 24(3): 253.  
52  
53  
54  
55 31 Niksic M, Rachet B, Warburton FG, *et al.* Cancer symptom awareness and barriers to  
56 symptomatic presentation in England—are we clear on cancer?. *Br J Can*. 2015; 113(3):  
57 533-542.  
58  
59  
60

- 1  
2  
3 32 Aizer AA, Chen MH, McCarthy EP, *et al.* Marital status and survival in patients with  
4 cancer. *J Clin Oncol.* 2013; 31: 3869–3876.  
5  
6  
7 33 Nayeri K, Pitaro G, Feldman JG. Marital status and stage at diagnosis in cancer. *N Y*  
8 *State J Med.* 1992; 92: 8–11.  
9  
10  
11 34 Levy SM, Herberman RB, Whiteside T, *et al.* Perceived social support and tumour  
12 estrogen/progesterone receptor status as predictors of natural killer cell activity in breast  
13 cancer patients. *Psychosomatic Medicine.* 1990; 52: 73–85.  
14  
15  
16 35 Hamilton TD, Leugner D, Kopciuk K, *et al.* Identification of prognostic inflammatory  
17 factors in colorectal liver metastases. *BMC Cancer.* 2014; 14: 542.  
18  
19  
20 36 Berkman LF. The role of social relations in health promotion. *Psychosomatic Medicine.*  
21 1995; 57(3): 245-254.  
22  
23  
24 37 Henrik Møller, Fredrik Sandin, David Robinson, *et al.* Colorectal cancer survival in  
25 socioeconomic groups in England: Variation is mainly in the short term after diagnosis.  
26 *Eur J Cancer.* 2012; 48(1): 46–53.  
27  
28  
29 38 Brewster DH, Clark DI, Stockton DL, *et al.* Characteristics of patients dying within 30  
30 days of diagnosis of breast or colorectal cancer in Scotland, 2003–2007. *Br J Cancer.*  
31 2011; 104(1): 60–67.  
32  
33  
34 39 Munro AJ, Bentley AHM, Ackland C, *et al.* Smoking compromises cause-specific  
35 survival in patients with operable colorectal cancer. *Clin Oncol.* 2006; 18(6): 436-440.  
36  
37  
38 40 Beeken RJ, Simon AE, Von Wagner C, *et al.* Cancer fatalism: deterring early  
39 presentation and increasing social inequalities? *Cancer Epidemiology Biomarkers &*  
40 *Prevention* 2011; 20(10): 2127-2131.  
41  
42  
43 41 Raine R, Wong W, Scholes S, *et al.* Social variations in access to hospital care for  
44 patients with colorectal, breast, and lung cancer between 1999 and 2006: retrospective  
45 analysis of hospital episode statistics. *BMJ.* 2010; 340: b5479.  
46  
47  
48 42 Sogaard M, Thomsen RW, Bossen KS, *et al.* The impact of comorbidity on cancer  
49 survival: a review. *Clin Epidemiol.* 2013; 5(1): 3-29.  
50  
51  
52  
53  
54  
55  
56  
57  
58  
59  
60

- 1  
2  
3 43 Gupta SK, Lamont EB. Patterns of presentation, diagnosis, and treatment in older  
4 patients with colon cancer and comorbid dementia. *J Am Ger Soc.* 2004; 52: 1681-1687.  
5  
6  
7 44 Raji MA, Kuo YF, Freeman JL, *et al.* Effect of a dementia diagnosis on survival of older  
8 patients after a diagnosis of breast, colon, or prostate cancer: implications for cancer  
9 care. *Arch Intern Med.* 2008; 168(18): 2033-2040.  
10  
11  
12  
13 45 Nagata JM, Hernández-Ramos I, Kurup AS, *et al.* Social determinants of health and  
14 seasonal influenza vaccination in adults  $\geq$  65 years: a systematic review of qualitative  
15 and quantitative data. *BMC Public Health.* 2013; 13(1): 1.  
16  
17  
18  
19 46 Van Oostrom SH, Picavet HSJ, De Bruin SR, *et al.* Multimorbidity of chronic diseases  
20 and health care utilization in general practice. *BMC Fam Pract.* 2013; 15(1): 1.  
21  
22  
23  
24 47 Kearney TM, Donnelly C, Kelly JM, *et al.* Validation of the completeness and accuracy  
25 of the Northern Ireland Cancer Registry. *Cancer Epidemiology.* 2013; 39(3): 401-404.  
26  
27  
28  
29 48 Forbes LJ, Simon AE, Warburton F, *et al.* Differences in cancer awareness and beliefs  
30 between Australia, Canada, Denmark, Norway, Sweden and the UK(the International  
31 Cancer Benchmarking Partnership): do they contribute to differences in cancer survival?  
32 *Br J Cancer.* 2013; 108(2): 292-300.  
33  
34  
35  
36 49 Evans REC, Brotherstone H, Miles A, *et al.* Gender differences in early detection of  
37 cancer. *J Men's Health Gender.* 2005; 2: 209-217.  
38  
39  
40  
41 50 Araghi M, Soerjomataram I, Jenkins M, *et al.* Global trends in colorectal cancer mortality:  
42 projections to the year 2035. *Int J Cancer.* 2019 [ePub ahead of print]. doi:  
43 10.1002/ijc.32055.  
44  
45  
46  
47 51 Colon cancer mortality statistics 1993-2017. N. Ireland Cancer Registry.  
48 [https://www.qub.ac.uk/research-](https://www.qub.ac.uk/research-centres/nicr/FileStore/OfficialStats2017/Mortality/Filetoupload,883604,en.xls)  
49 [centres/nicr/FileStore/OfficialStats2017/Mortality/Filetoupload,883604,en.xls](https://www.qub.ac.uk/research-centres/nicr/FileStore/OfficialStats2017/Mortality/Filetoupload,883604,en.xls) (accessed  
50 19 March 2019).  
51  
52  
53  
54 52 Bowel cancer survival statistics. Cancer Research UK.  
55 [https://www.cancerresearchuk.org/sites/default/files/cstream-](https://www.cancerresearchuk.org/sites/default/files/cstream-node/surv_1_5_10yr_bowel.pdf)  
56 [node/surv\\_1\\_5\\_10yr\\_bowel.pdf](https://www.cancerresearchuk.org/sites/default/files/cstream-node/surv_1_5_10yr_bowel.pdf) (accessed 19 March 2019).  
57  
58  
59  
60

1  
2  
3 **Figure legend**  
4

5 Figure 1: case inclusions and exclusions  
6  
7  
8  
9  
10  
11  
12  
13  
14  
15  
16  
17  
18  
19  
20  
21  
22  
23  
24  
25  
26  
27  
28  
29  
30  
31  
32  
33  
34  
35  
36  
37  
38  
39  
40  
41  
42  
43  
44  
45  
46  
47  
48  
49  
50  
51  
52  
53  
54  
55  
56  
57  
58  
59  
60

For peer review only

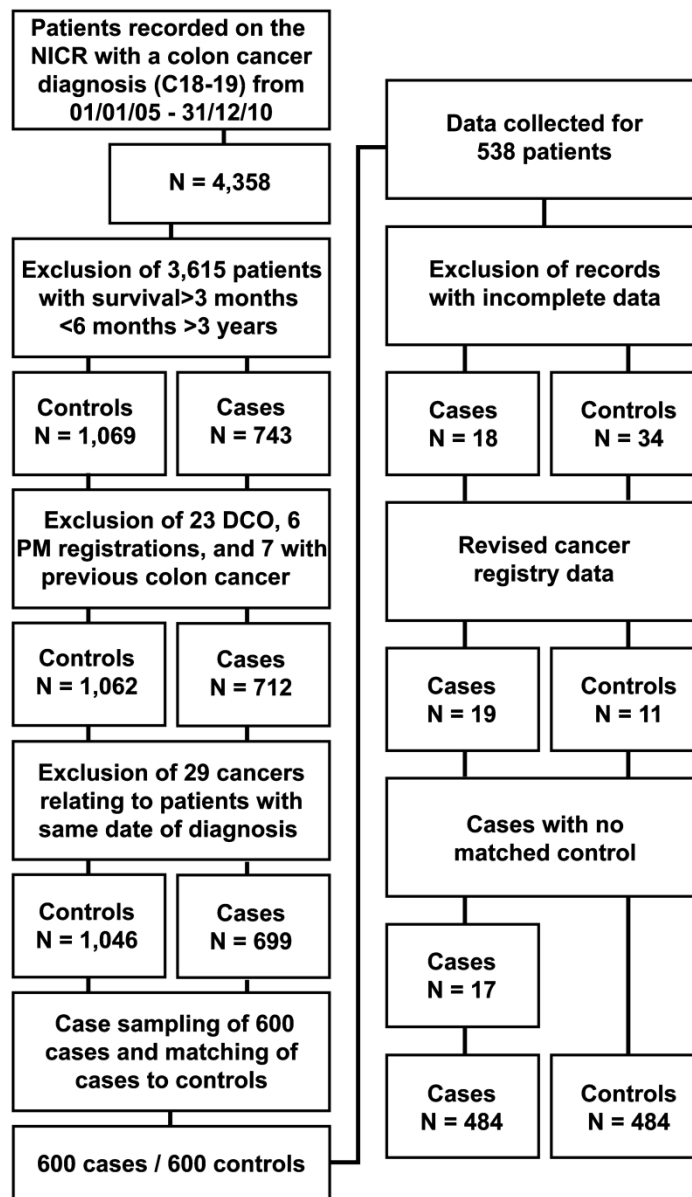

Case inclusions and exclusions

144x247mm (600 x 600 DPI)

**Supplementary Table S1: Distribution of the case sample and the remaining patients who died within three months of diagnosis who were not included in the study**

| Characteristics                                        |                    | Case Sample<br>n=484 | Cases not<br>included<br>n=196 | P value            |
|--------------------------------------------------------|--------------------|----------------------|--------------------------------|--------------------|
| Sex<br>%                                               | Male               | 52.7                 | 44.3                           | 0.05 <sup>x</sup>  |
|                                                        | Female             | 47.3                 | 55.7                           |                    |
| Year diagnosed<br>%                                    | 2005-06            | 39.2                 | 29.4                           | <0.01 <sup>x</sup> |
|                                                        | 2007-08            | 38.5                 | 18.40                          |                    |
|                                                        | 2009-10            | 22.3                 | 51.3                           |                    |
| Dukes stage<br>%                                       | A                  | 2.3                  | 1.0                            | 0.27 <sup>x</sup>  |
|                                                        | B                  | 10.1                 | 7.0                            |                    |
|                                                        | C                  | 10.7                 | 9.0                            |                    |
|                                                        | D                  | 37.0                 | 44.3                           |                    |
|                                                        | Unknown            | 39.9                 | 38.8                           |                    |
| Deprivation quintile<br>%                              | 1 (least deprived) | 16.6                 | 15.2                           | 0.87 <sup>x</sup>  |
|                                                        | 2                  | 20.9                 | 22.7                           |                    |
|                                                        | 3                  | 17.4                 | 18.7                           |                    |
|                                                        | 4                  | 24.8                 | 21.7                           |                    |
|                                                        | 5 (most deprived)  | 20.3                 | 21.7                           |                    |
| Mean age at diagnosis in years<br>(Standard deviation) |                    | 76.5<br>(10.6)       | 77.6<br>(10.3)                 | 0.83 <sup>t</sup>  |
| Mean survival duration in days<br>(Standard deviation) |                    | 36.7<br>(24.7)       | 33.8<br>(39.9)                 | 0.82 <sup>β</sup>  |

*P-values presented for chi squared tests ( $\chi$ ), t-tests ( $t$ ) and Kaplan Meier ( $\beta$ )*

**STROBE checklist of items to be included in reports of observational studies in epidemiology\***  
**Checklist for cohort, case-control, and cross-sectional studies (combined)**

| Section/Topic             | Item # | Recommendation                                                                                                                                                                                                                                                                                                                                                                                                                                                         | Reported on page # |
|---------------------------|--------|------------------------------------------------------------------------------------------------------------------------------------------------------------------------------------------------------------------------------------------------------------------------------------------------------------------------------------------------------------------------------------------------------------------------------------------------------------------------|--------------------|
| Title and abstract        | 1      | (a) Indicate the study’s design with a commonly used term in the title or the abstract                                                                                                                                                                                                                                                                                                                                                                                 | 1                  |
|                           |        | (b) Provide in the abstract an informative and balanced summary of what was done and what was found                                                                                                                                                                                                                                                                                                                                                                    | 2                  |
| <b>Introduction</b>       |        |                                                                                                                                                                                                                                                                                                                                                                                                                                                                        |                    |
| Background/rationale      | 2      | Explain the scientific background and rationale for the investigation being reported                                                                                                                                                                                                                                                                                                                                                                                   | 4                  |
| Objectives                | 3      | State specific objectives, including any pre-specified hypotheses                                                                                                                                                                                                                                                                                                                                                                                                      | 5                  |
| <b>Methods</b>            |        |                                                                                                                                                                                                                                                                                                                                                                                                                                                                        |                    |
| Study design              | 4      | Present key elements of study design early in the paper                                                                                                                                                                                                                                                                                                                                                                                                                | 2 and 5            |
| Setting                   | 5      | Describe the setting, locations, and relevant dates, including periods of recruitment, exposure, follow-up, and data collection                                                                                                                                                                                                                                                                                                                                        | 2 and 5            |
| Participants              | 6      | (a) <i>Cohort study</i> —Give the eligibility criteria, and the sources and methods of selection of participants. Describe methods of follow-up<br><i>Case-control study</i> —Give the eligibility criteria, and the sources and methods of case ascertainment and control selection. Give the rationale for the choice of cases and controls<br><i>Cross-sectional study</i> —Give the eligibility criteria, and the sources and methods of selection of participants | 5                  |
|                           |        | (b) <i>Cohort study</i> —For matched studies, give matching criteria and number of exposed and unexposed<br><i>Case-control study</i> —For matched studies, give matching criteria and the number of controls per case                                                                                                                                                                                                                                                 | 5                  |
| Variables                 | 7      | Clearly define all outcomes, exposures, predictors, potential confounders, and effect modifiers. Give diagnostic criteria, if applicable                                                                                                                                                                                                                                                                                                                               | 6                  |
| Data sources/ measurement | 8*     | For each variable of interest, give sources of data and details of methods of assessment (measurement). Describe comparability of assessment methods if there is more than one group                                                                                                                                                                                                                                                                                   | 6                  |
| Bias                      | 9      | Describe any efforts to address potential sources of bias                                                                                                                                                                                                                                                                                                                                                                                                              | 6-7                |
| Study size                | 10     | Explain how the study size was arrived at                                                                                                                                                                                                                                                                                                                                                                                                                              | 6-7                |
| Quantitative variables    | 11     | Explain how quantitative variables were handled in the analyses. If applicable, describe which groupings were chosen and why                                                                                                                                                                                                                                                                                                                                           | 6-7                |
| Statistical methods       | 12     | (a) Describe all statistical methods, including those used to control for confounding                                                                                                                                                                                                                                                                                                                                                                                  | 6-7                |
|                           |        | (b) Describe any methods used to examine subgroups and interactions                                                                                                                                                                                                                                                                                                                                                                                                    | 7                  |
|                           |        | (c) Explain how missing data were addressed                                                                                                                                                                                                                                                                                                                                                                                                                            | Fig 1              |
|                           |        | (d) <i>Cohort study</i> —If applicable, explain how loss to follow-up was addressed<br><i>Case-control study</i> —If applicable, explain how matching of cases and controls was addressed                                                                                                                                                                                                                                                                              | 5                  |

|                          |     |                                                                                                                                                                                                              |             |
|--------------------------|-----|--------------------------------------------------------------------------------------------------------------------------------------------------------------------------------------------------------------|-------------|
|                          |     | <i>Cross-sectional study</i> —If applicable, describe analytical methods taking account of sampling strategy                                                                                                 |             |
|                          |     | (e) Describe any sensitivity analyses                                                                                                                                                                        | -           |
| <b>Results</b>           |     |                                                                                                                                                                                                              |             |
| Participants             | 13* | (a) Report numbers of individuals at each stage of study—eg numbers potentially eligible, examined for eligibility, confirmed eligible, included in the study, completing follow-up, and analysed            | 5 and fig 1 |
|                          |     | (b) Give reasons for non-participation at each stage                                                                                                                                                         | Fig 1       |
|                          |     | (c) Consider use of a flow diagram                                                                                                                                                                           | Fig 1       |
| Descriptive data         | 14* | (a) Give characteristics of study participants (eg demographic, clinical, social) and information on exposures and potential confounders                                                                     | Table 1     |
|                          |     | (b) Indicate number of participants with missing data for each variable of interest                                                                                                                          | Table 1-4   |
|                          |     | (c) <i>Cohort study</i> —Summarise follow-up time (eg, average and total amount)                                                                                                                             |             |
| Outcome data             | 15* | <i>Cohort study</i> —Report numbers of outcome events or summary measures over time                                                                                                                          |             |
|                          |     | <i>Case-control study</i> —Report numbers in each exposure category, or summary measures of exposure                                                                                                         | Table 1-4   |
|                          |     | <i>Cross-sectional study</i> —Report numbers of outcome events or summary measures                                                                                                                           |             |
| Main results             | 16  | (a) Give unadjusted estimates and, if applicable, confounder-adjusted estimates and their precision (eg, 95% confidence interval). Make clear which confounders were adjusted for and why they were included | Table 1-5   |
|                          |     | (b) Report category boundaries when continuous variables were categorized                                                                                                                                    | Table 1-4   |
|                          |     | (c) If relevant, consider translating estimates of relative risk into absolute risk for a meaningful time period                                                                                             |             |
| Other analyses           | 17  | Report other analyses done—eg analyses of subgroups and interactions, and sensitivity analyses                                                                                                               | Table 5     |
| <b>Discussion</b>        |     |                                                                                                                                                                                                              |             |
| Key results              | 18  | Summarise key results with reference to study objectives                                                                                                                                                     | 18-20       |
| Limitations              | 19  | Discuss limitations of the study, taking into account sources of potential bias or imprecision. Discuss both direction and magnitude of any potential bias                                                   | 21          |
| Interpretation           | 20  | Give a cautious overall interpretation of results considering objectives, limitations, multiplicity of analyses, results from similar studies, and other relevant evidence                                   | 19-20       |
| Generalisability         | 21  | Discuss the generalisability (external validity) of the study results                                                                                                                                        | 21-22       |
| <b>Other information</b> |     |                                                                                                                                                                                                              |             |
| Funding                  | 22  | Give the source of funding and the role of the funders for the present study and, if applicable, for the original study on which the present article is based                                                | 23          |

\*Give information separately for cases and controls in case-control studies and, if applicable, for exposed and unexposed groups in cohort and cross-sectional studies.

**Note:** An Explanation and Elaboration article discusses each checklist item and gives methodological background and published examples of transparent reporting. The STROBE checklist is best used in conjunction with this article (freely available on the Web sites of PLoS Medicine at <http://www.plosmedicine.org/>, Annals of Internal Medicine at <http://www.annals.org/>, and Epidemiology at <http://www.epidem.com/>). Information on the STROBE Initiative is available at [www.strobe-statement.org](http://www.strobe-statement.org).
