# Supplementary material for: Predictors of an early death in patients diagnosed with colon cancer: a retrospective case–control study in the UK
Source: PubMed Central journal article supplement (PMC6588982; doi:10.1136/bmjopen-2018-026057), 2019-06-19
Supplement: bmjopen-2018-026057supp001.pdf [file bmjopen-2018-026057supp001.pdf]

**Supplementary Table S1: Distribution of the case sample and the remaining patients who died within three months of diagnosis who were not included in the study**

| Characteristics                                     |                    | Case Sample<br>n=484 | Cases not included<br>n=196 | P value            |
|-----------------------------------------------------|--------------------|----------------------|-----------------------------|--------------------|
| Sex %                                               | Male               | 52.7                 | 44.3                        | 0.05 <sup>x</sup>  |
|                                                     | Female             | 47.3                 | 55.7                        |                    |
| Year diagnosed %                                    | 2005-06            | 39.2                 | 29.4                        | <0.01 <sup>x</sup> |
|                                                     | 2007-08            | 38.5                 | 18.40                       |                    |
|                                                     | 2009-10            | 22.3                 | 51.3                        |                    |
| Dukes stage %                                       | A                  | 2.3                  | 1.0                         | 0.27 <sup>x</sup>  |
|                                                     | B                  | 10.1                 | 7.0                         |                    |
|                                                     | C                  | 10.7                 | 9.0                         |                    |
|                                                     | D                  | 37.0                 | 44.3                        |                    |
|                                                     | Unknown            | 39.9                 | 38.8                        |                    |
| Deprivation quintile %                              | 1 (least deprived) | 16.6                 | 15.2                        | 0.87 <sup>x</sup>  |
|                                                     | 2                  | 20.9                 | 22.7                        |                    |
|                                                     | 3                  | 17.4                 | 18.7                        |                    |
|                                                     | 4                  | 24.8                 | 21.7                        |                    |
|                                                     | 5 (most deprived)  | 20.3                 | 21.7                        |                    |
| Mean age at diagnosis in years (Standard deviation) |                    | 76.5 (10.6)          | 77.6 (10.3)                 | 0.83 <sup>t</sup>  |
| Mean survival duration in days (Standard deviation) |                    | 36.7 (24.7)          | 33.8 (39.9)                 | 0.82 <sup>β</sup>  |

*P-values presented for chi squared tests ( $\chi$ ), t-tests (*t*) and Kaplan Meier ( $\beta$ )*
